# Supplementary material
Source: PubMed Central journal article supplement (PMC3916654)

Supplemental Data Set 1. MS/MS spectra of endogenous *N*-glycopeptides. *N*-glycans structures were determined manually

# TU069753

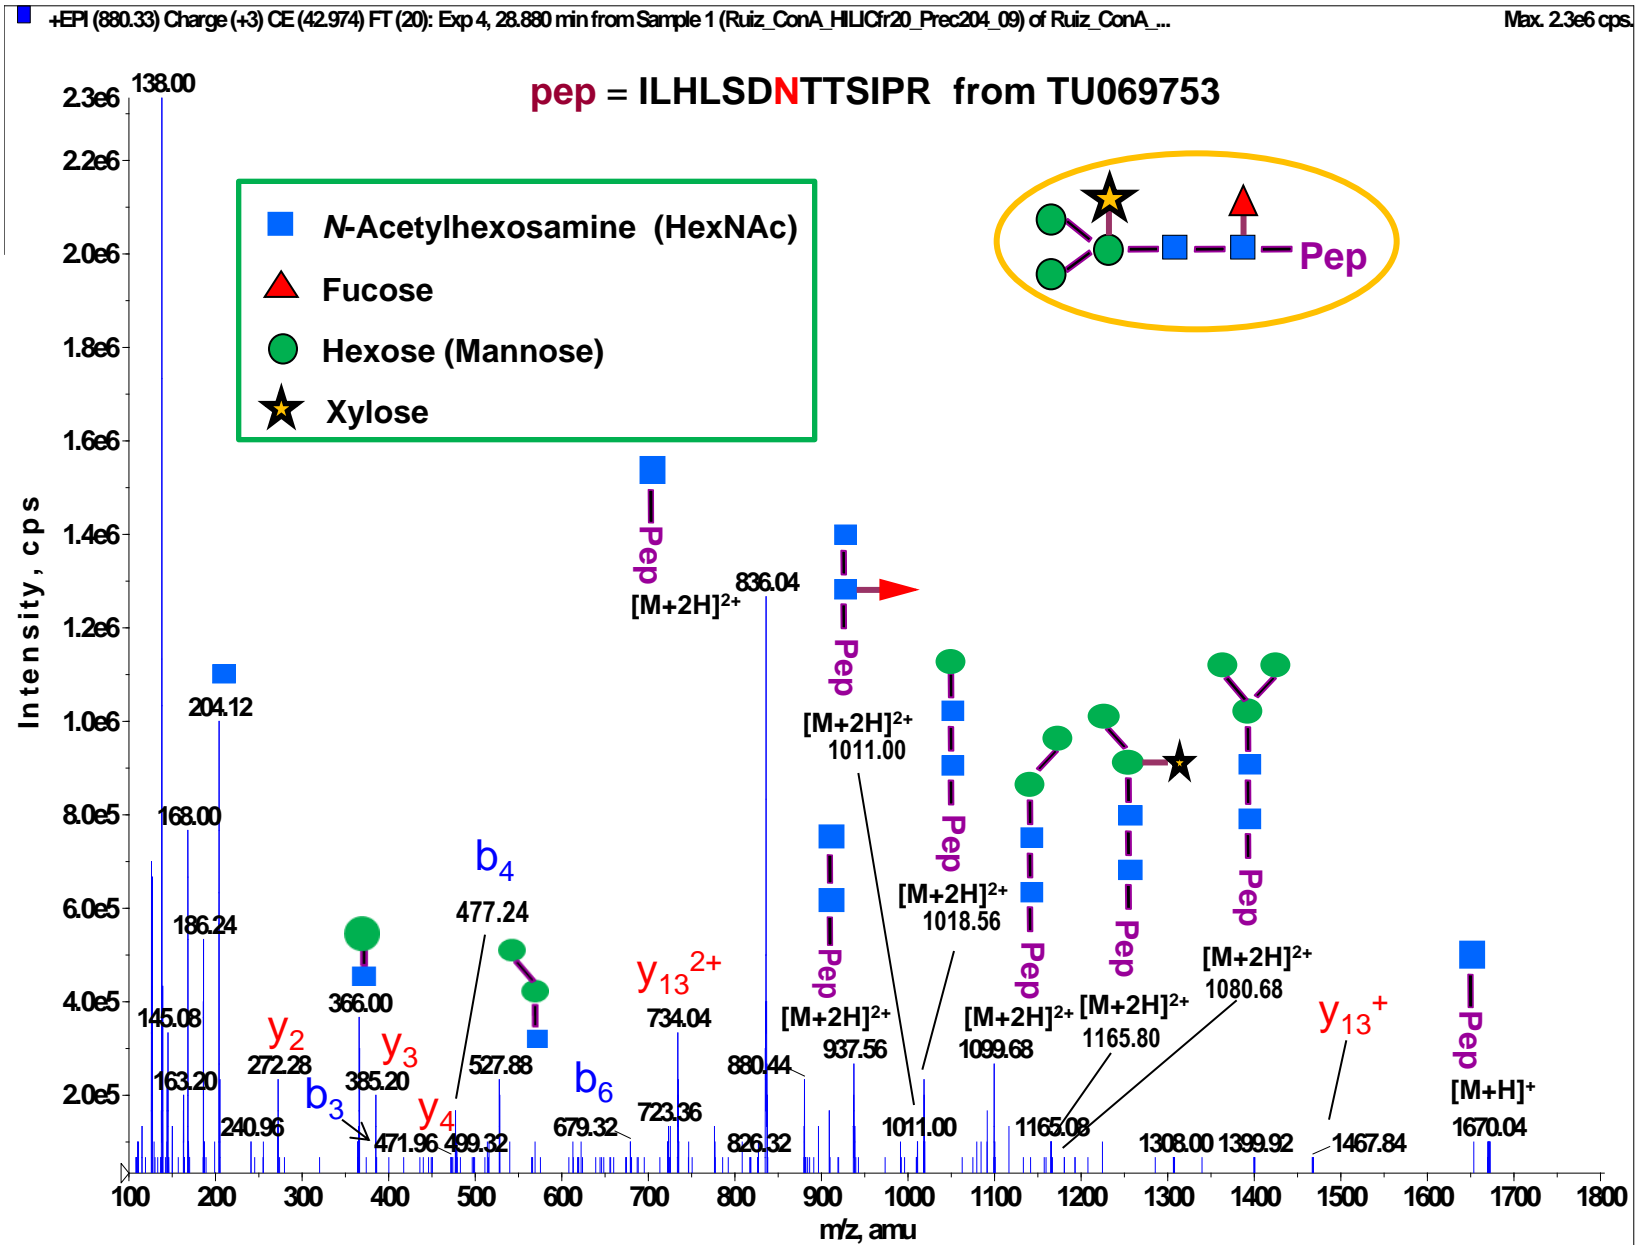

# TU004342

+EPI (1080.93) Charge (+2) CE (58.9654) FT (20): Exp 4, 28.437 min from Sample 1 (Ruiz\_ConA\_HLICfr21\_Prec204\_10) of Ruiz\_Con...

Max. 6.7e6 cps.

pep = NEFNITPR from TU004342

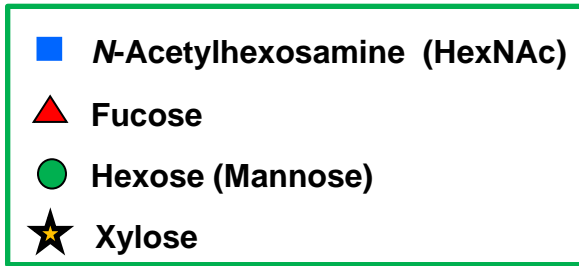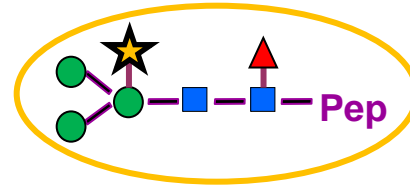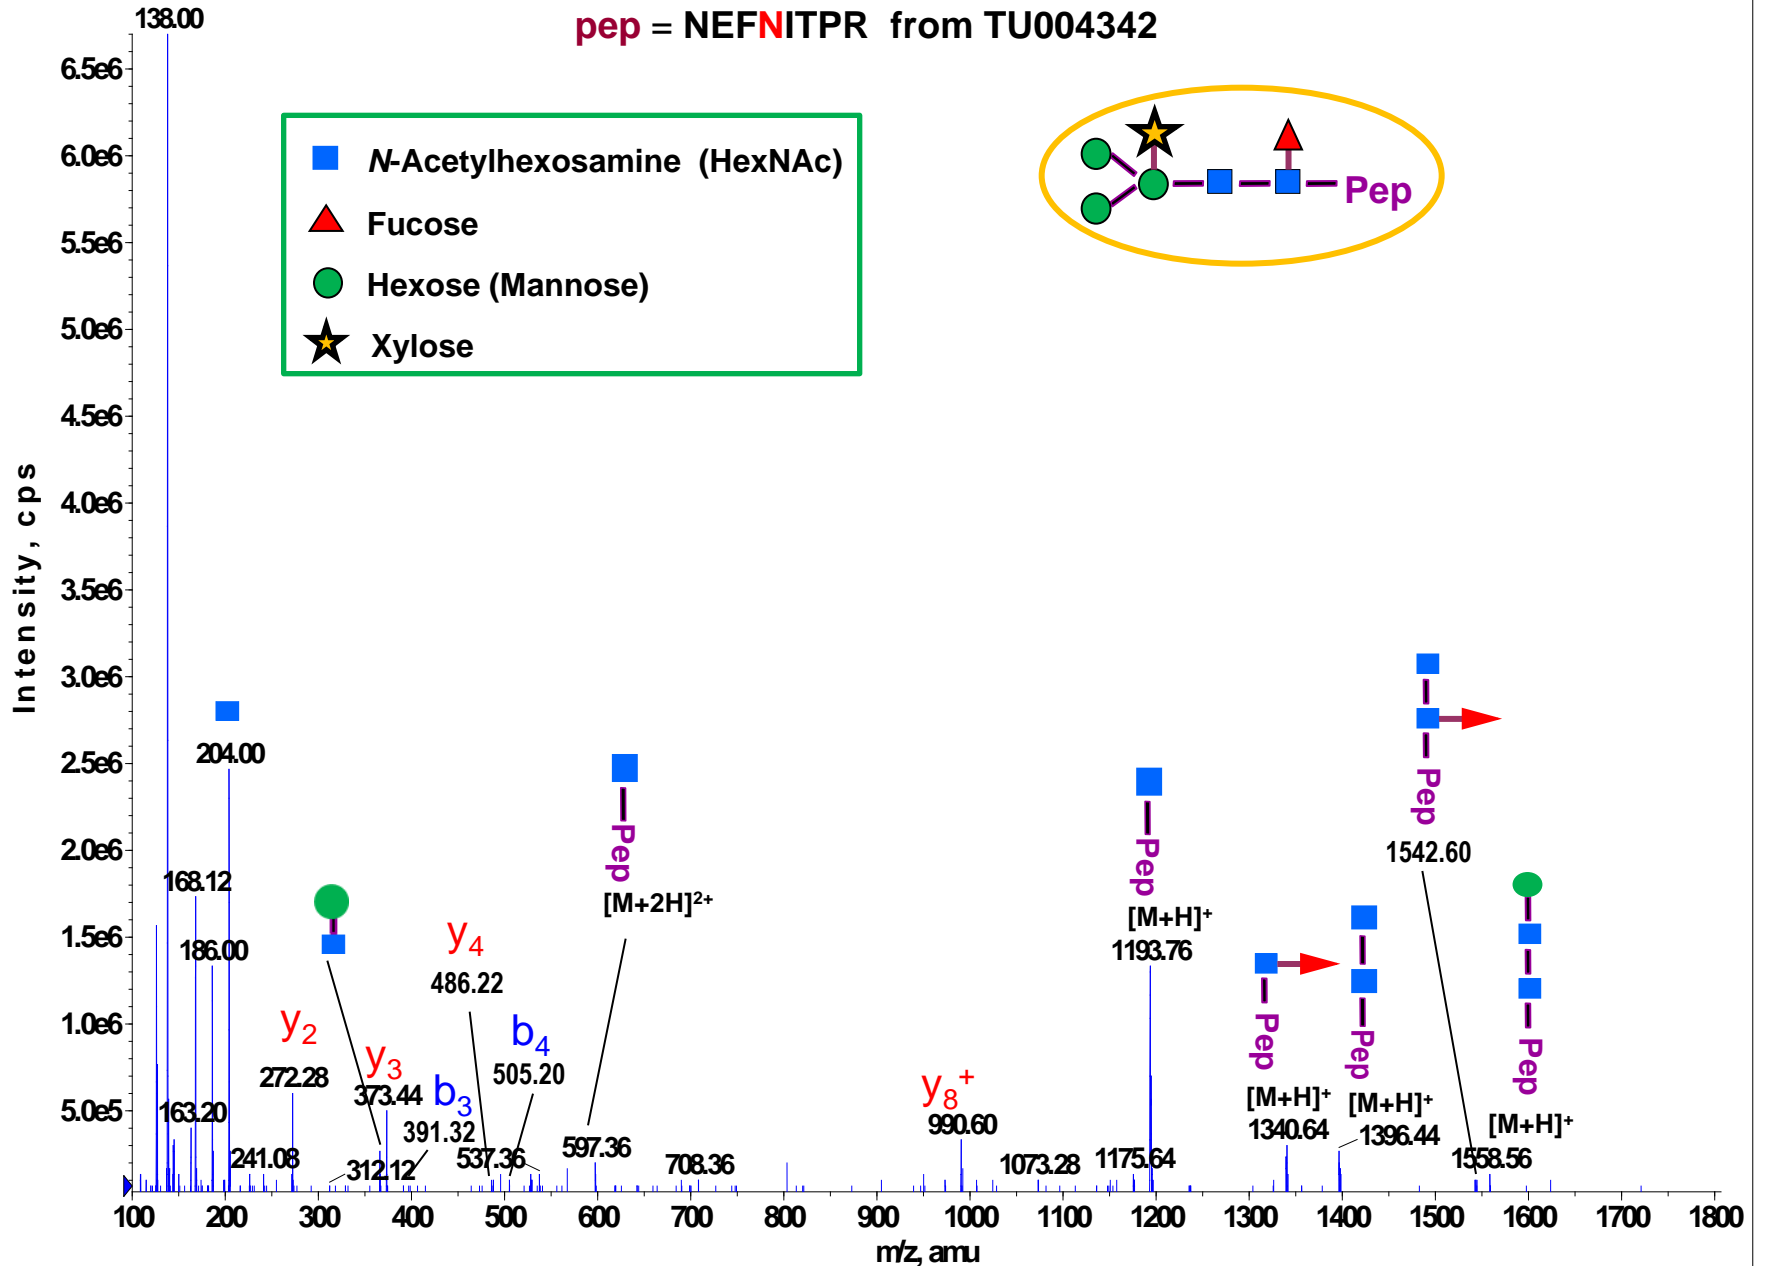

# TU052308

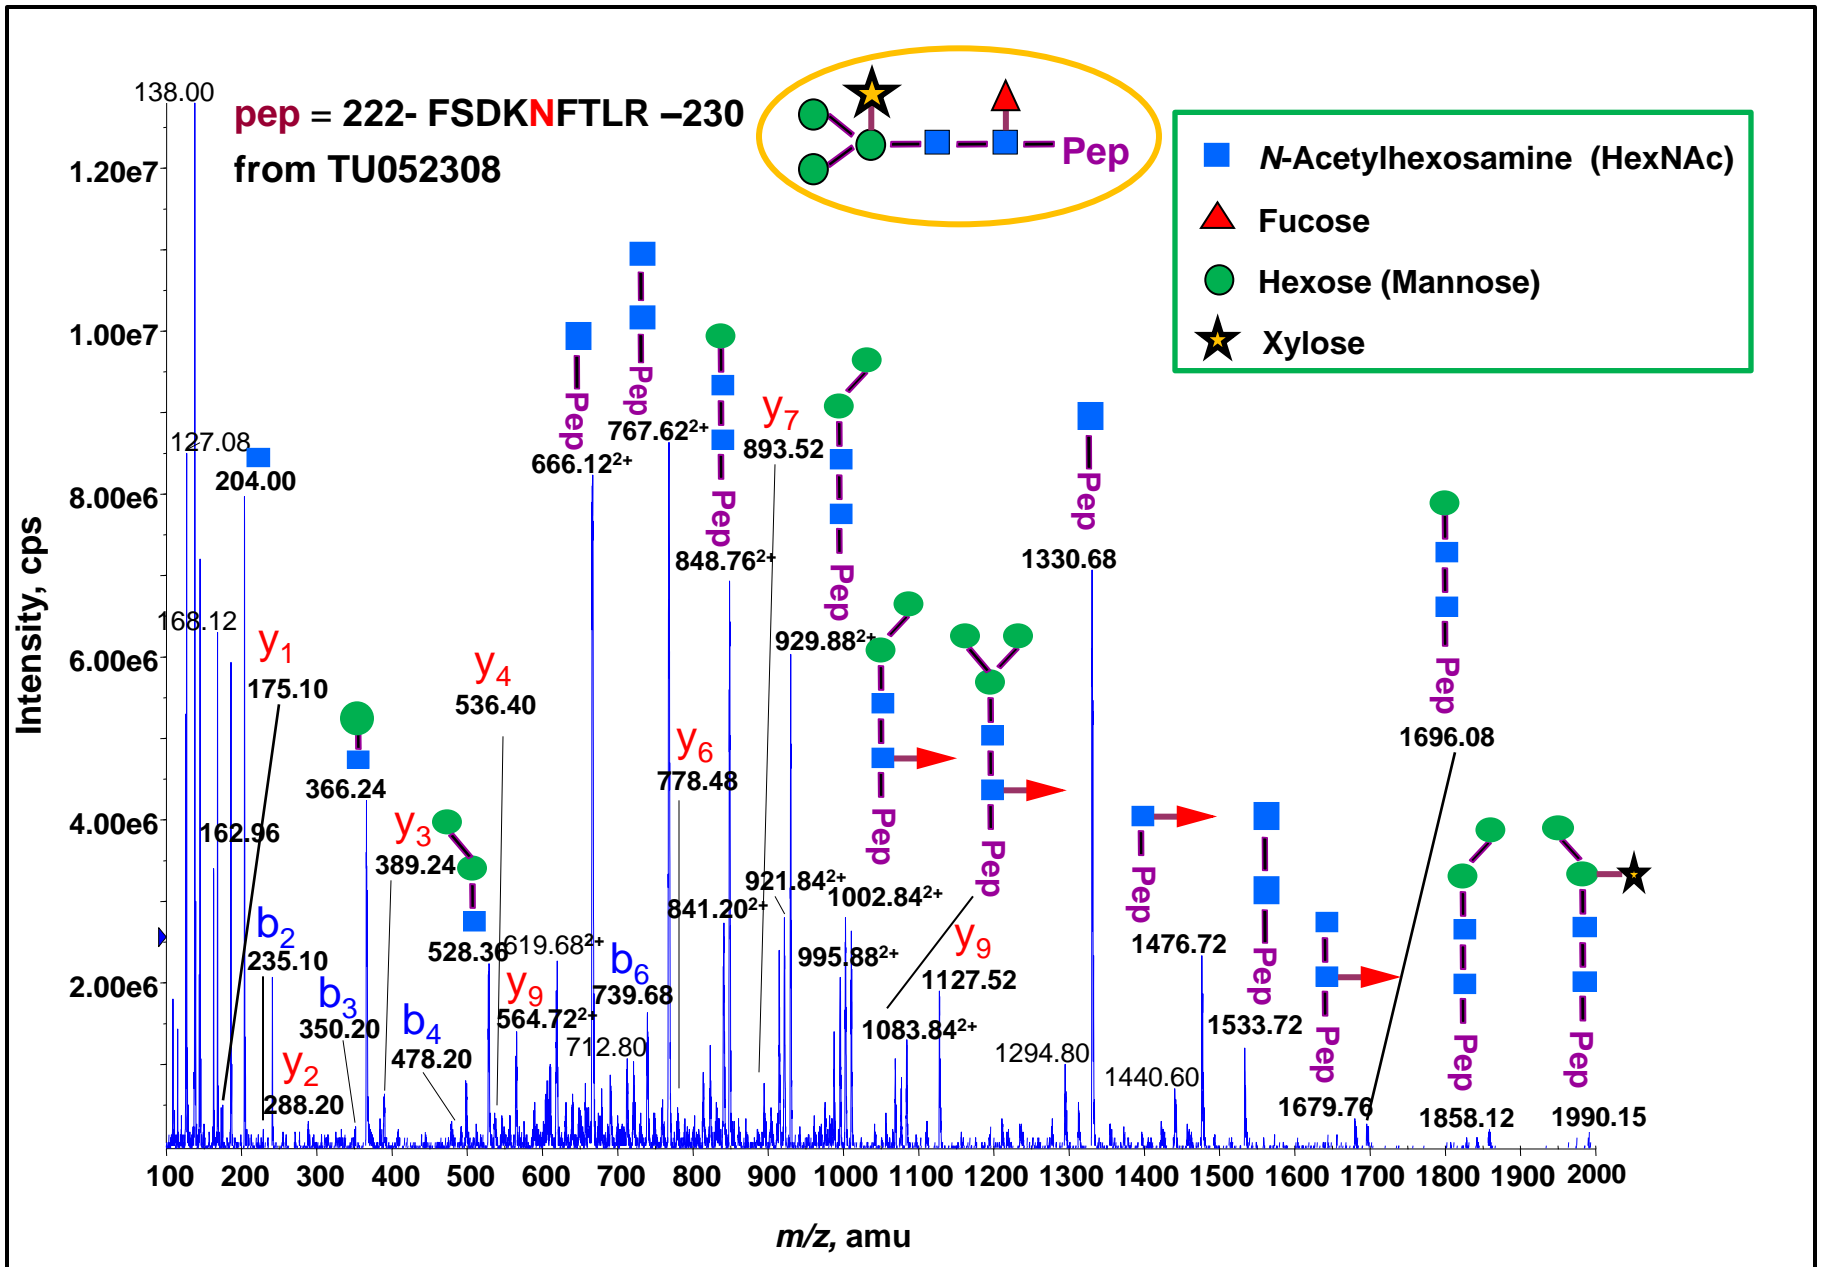

# TU032073

+EPI (762.36) Charge (+3) CE (38.0193) FT (20): Exp 3, 25.689 to 25.849 min from Sample 1 (Ruiz\_ConA\_HILICr20\_Prec204\_09) of R...

Max. 4.9e6 cps.

pep = FSDKNFTVR from TU032073

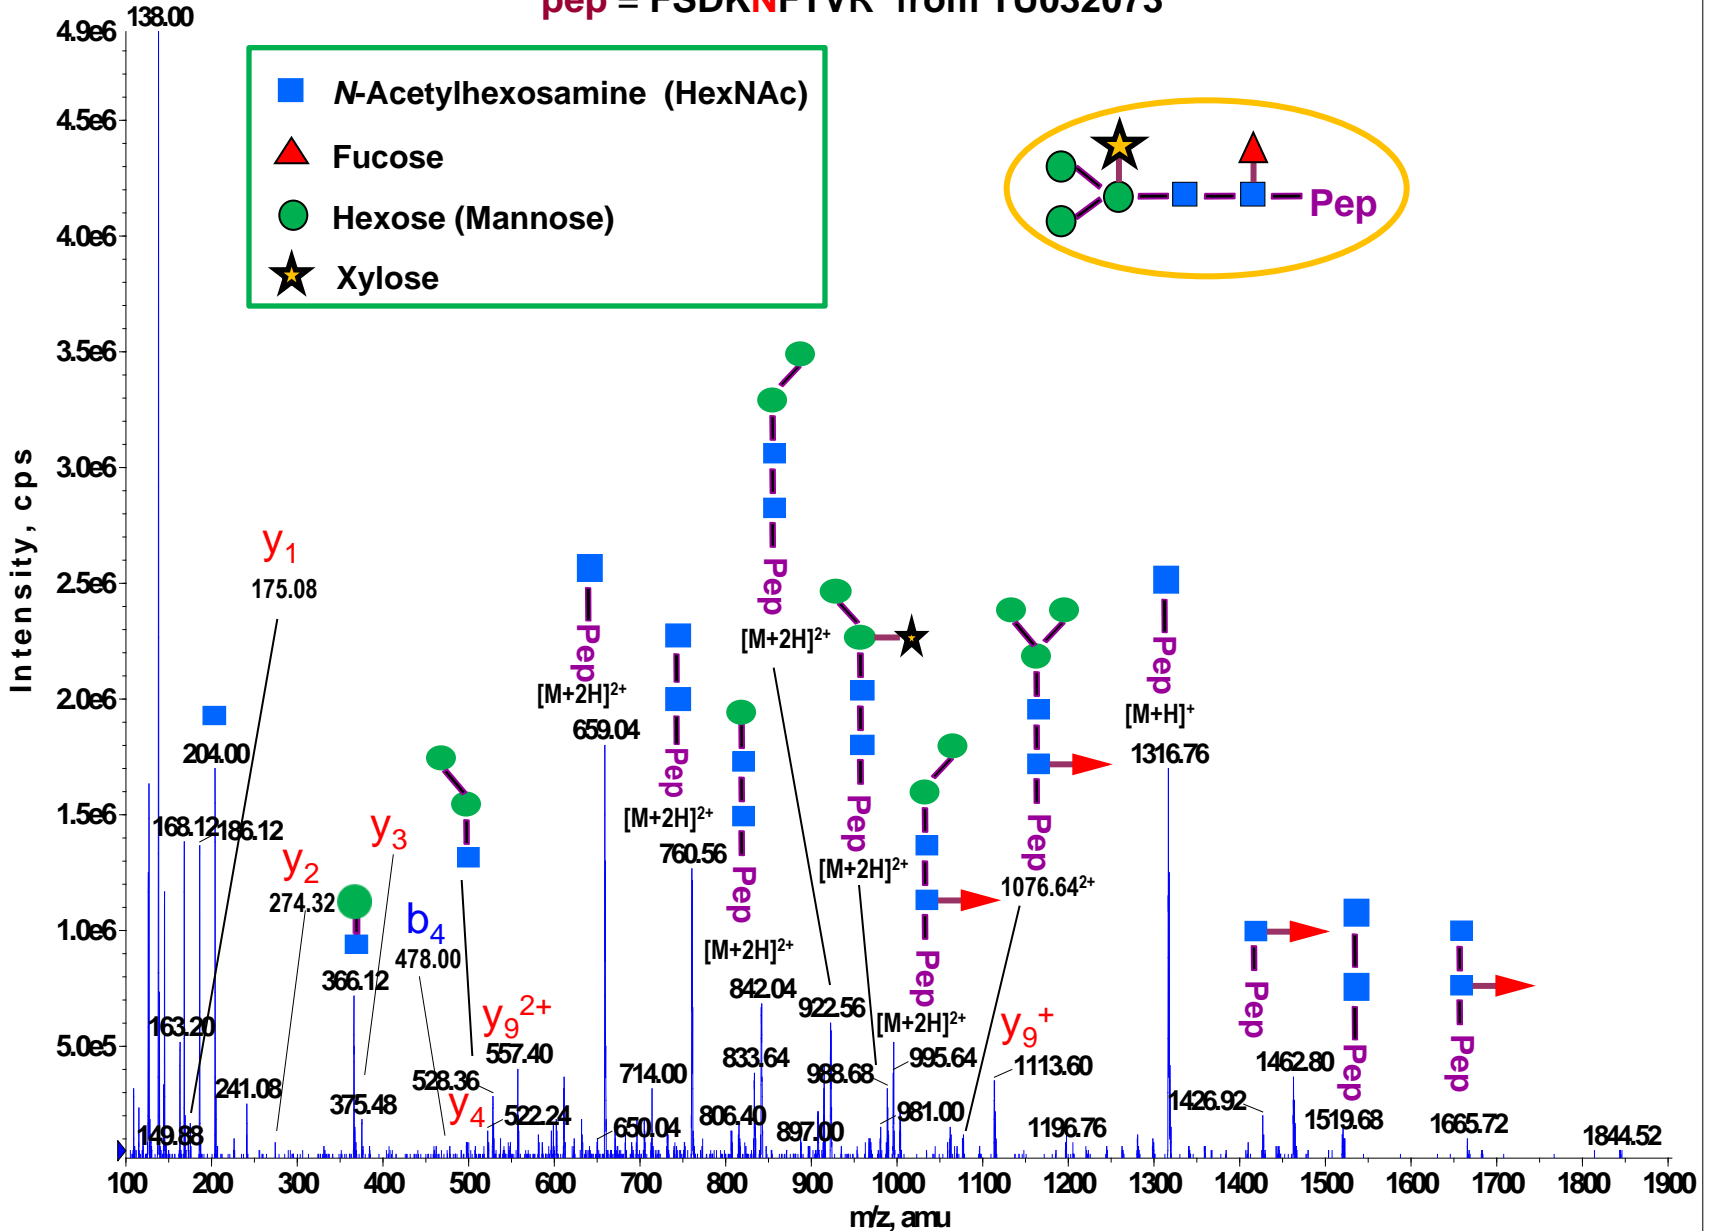

# TU026176

+EPI (831.62) Charge (+3) CE (40.9281) FT (20): Exp 4, 30.915 min from Sample 1 (Ruiz\_ConA\_HILICFr21\_Prec204\_10) of Ruiz\_ConA... Max. 7.1e6 cps.

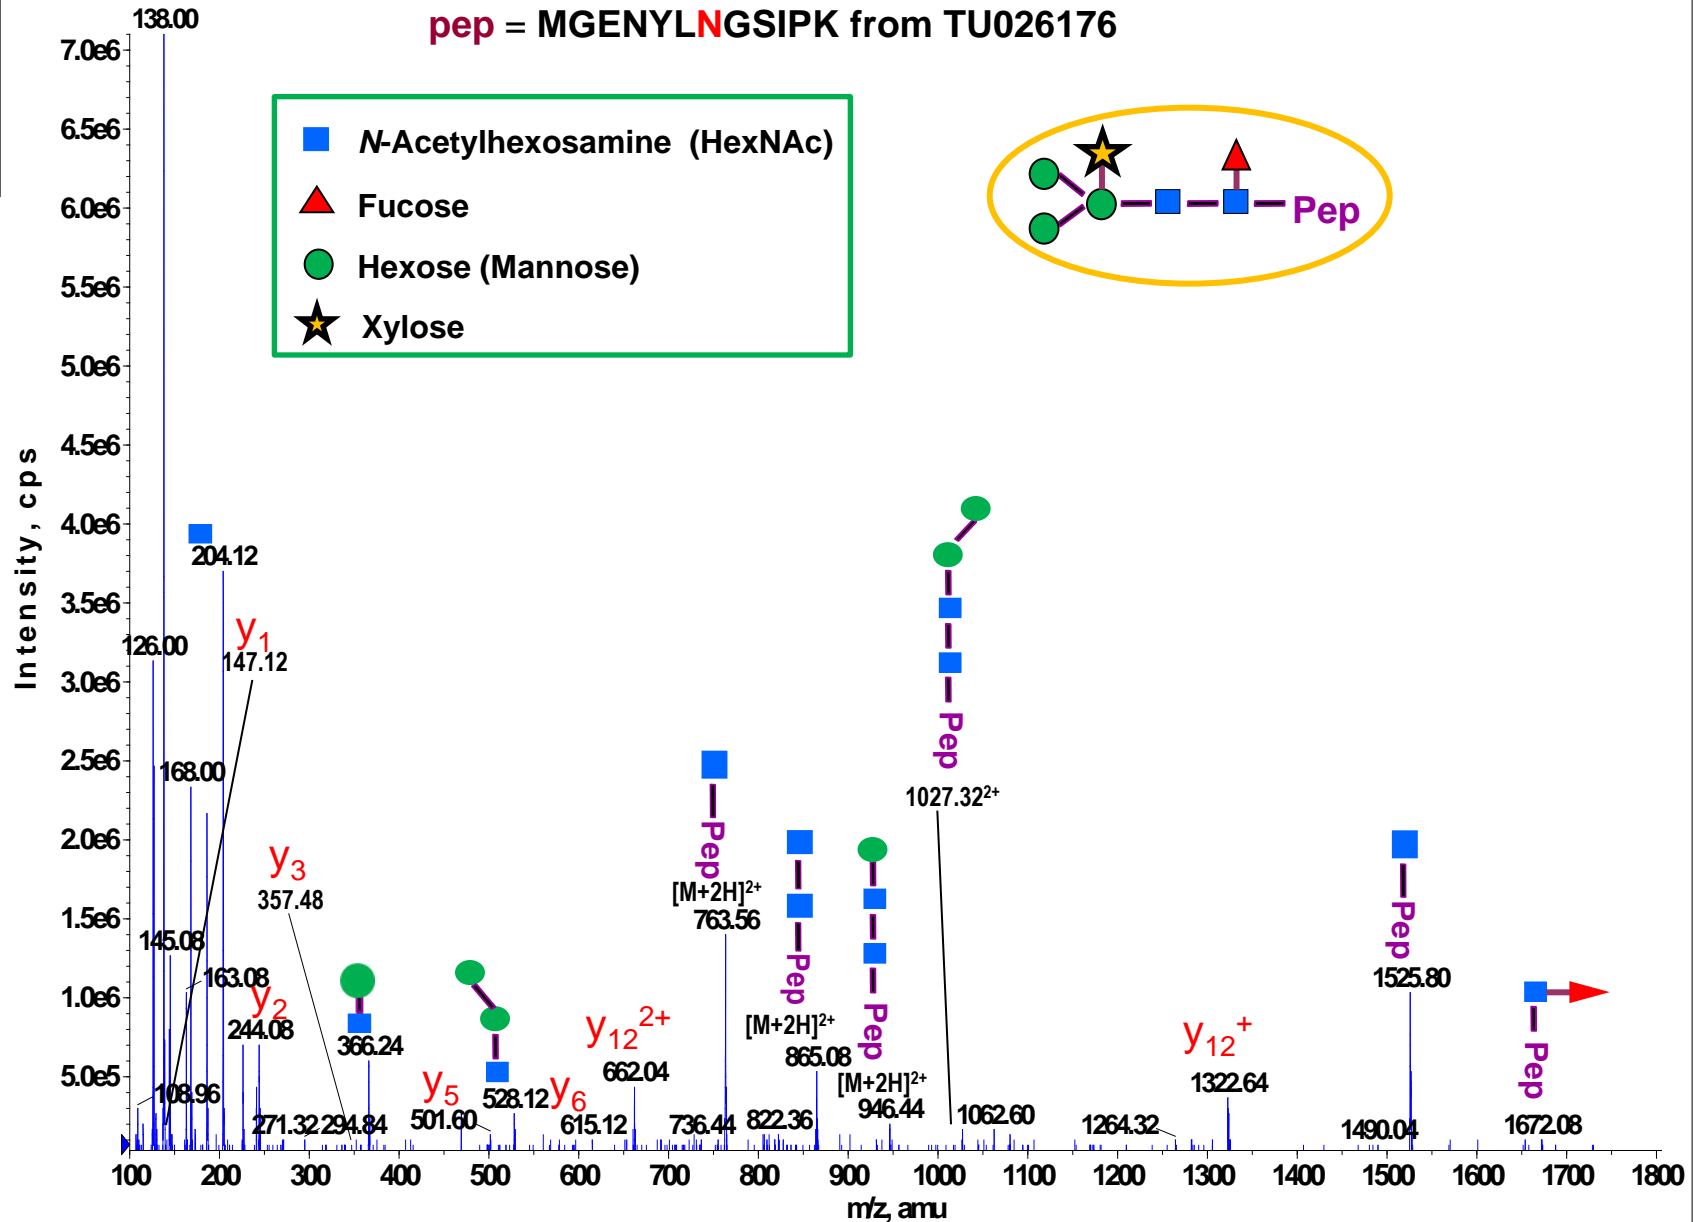

# TU026176

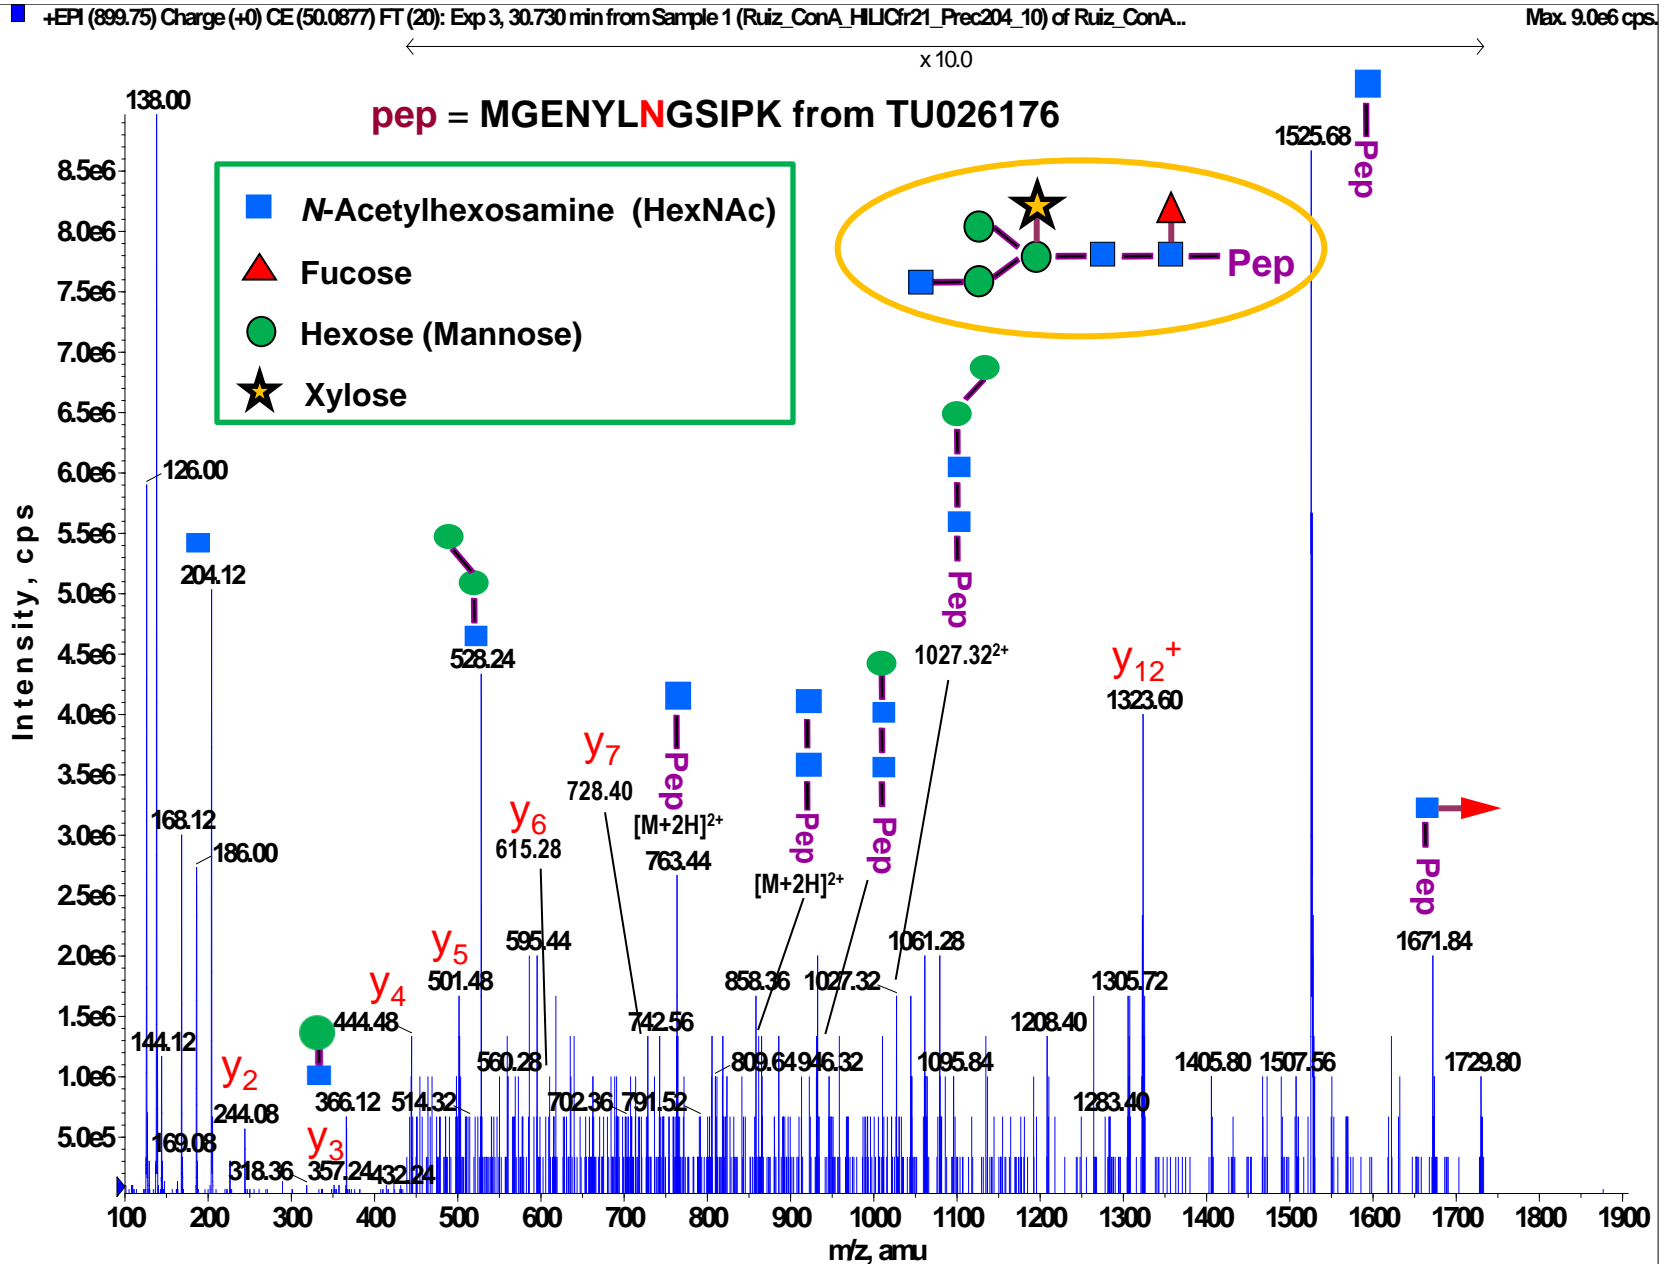

# TU026176

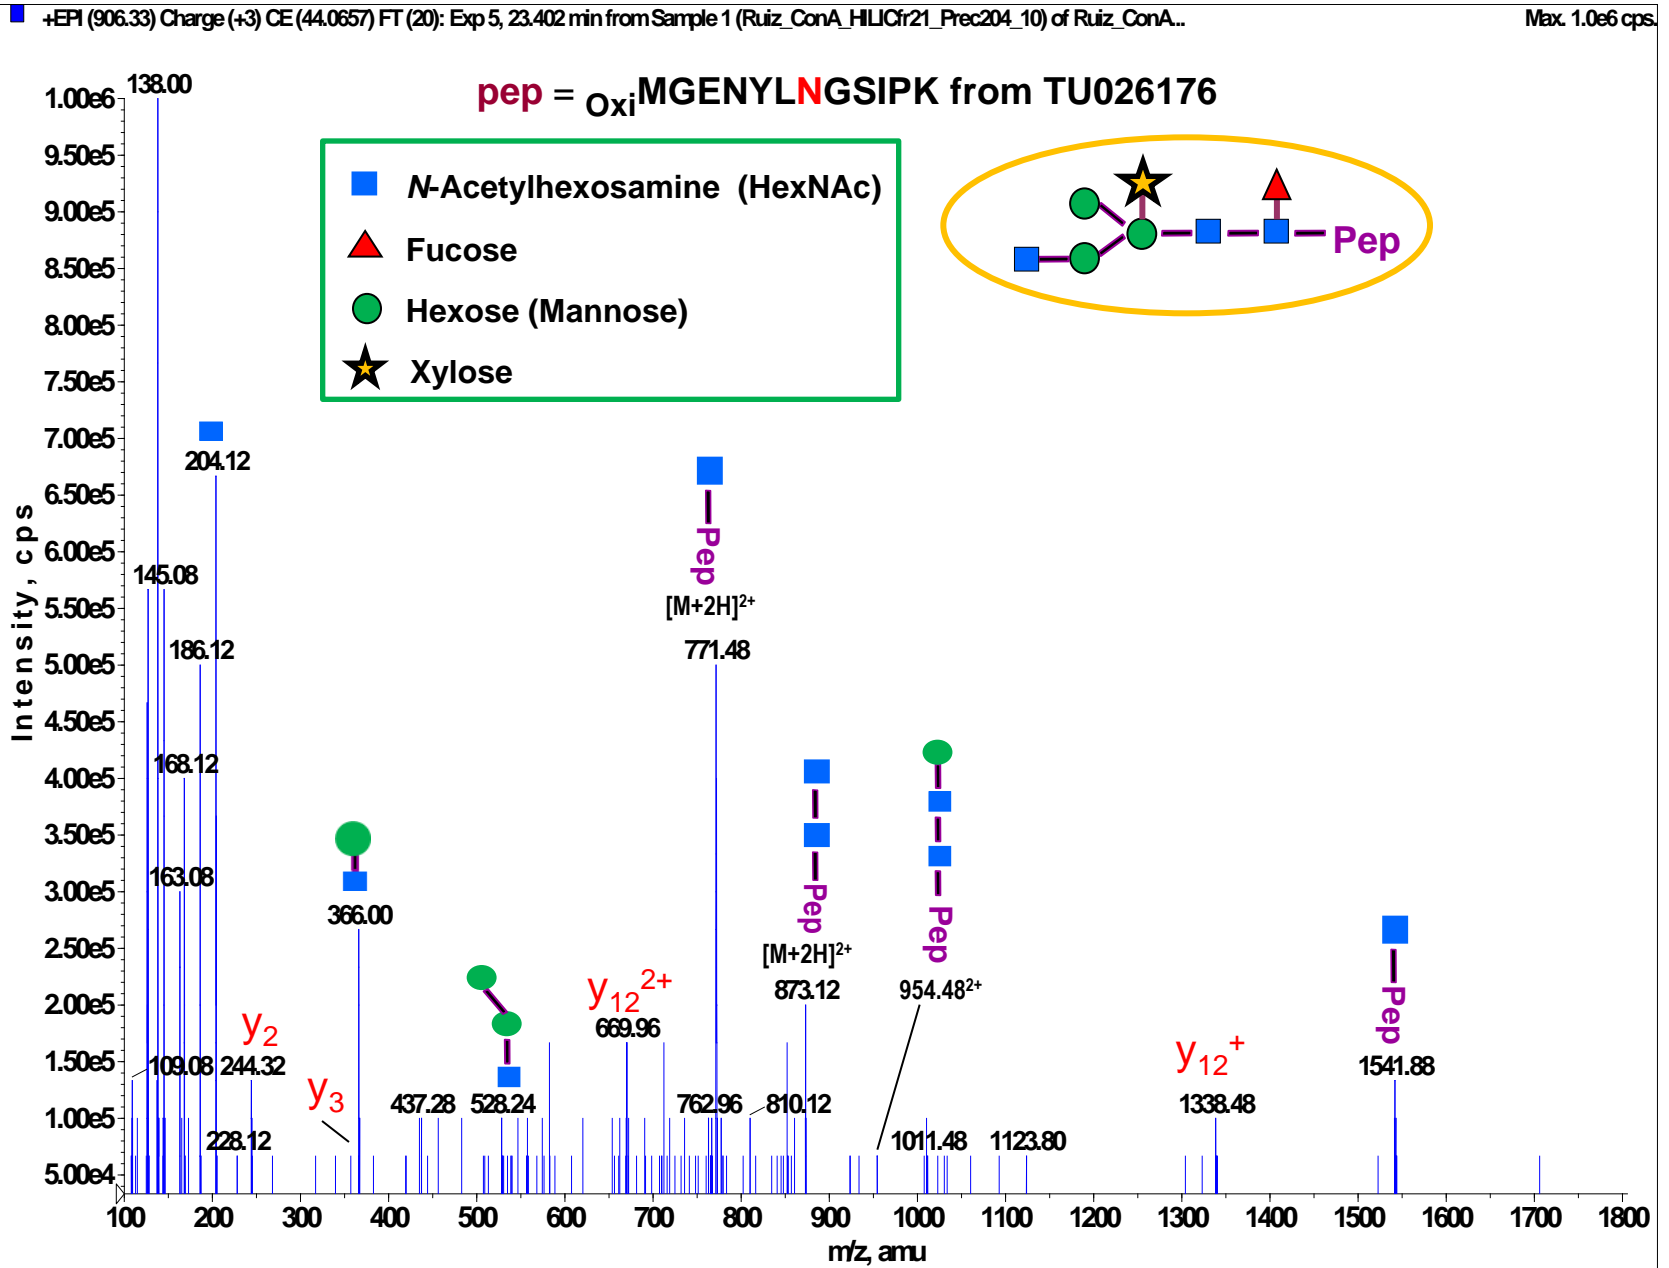



# TU035508

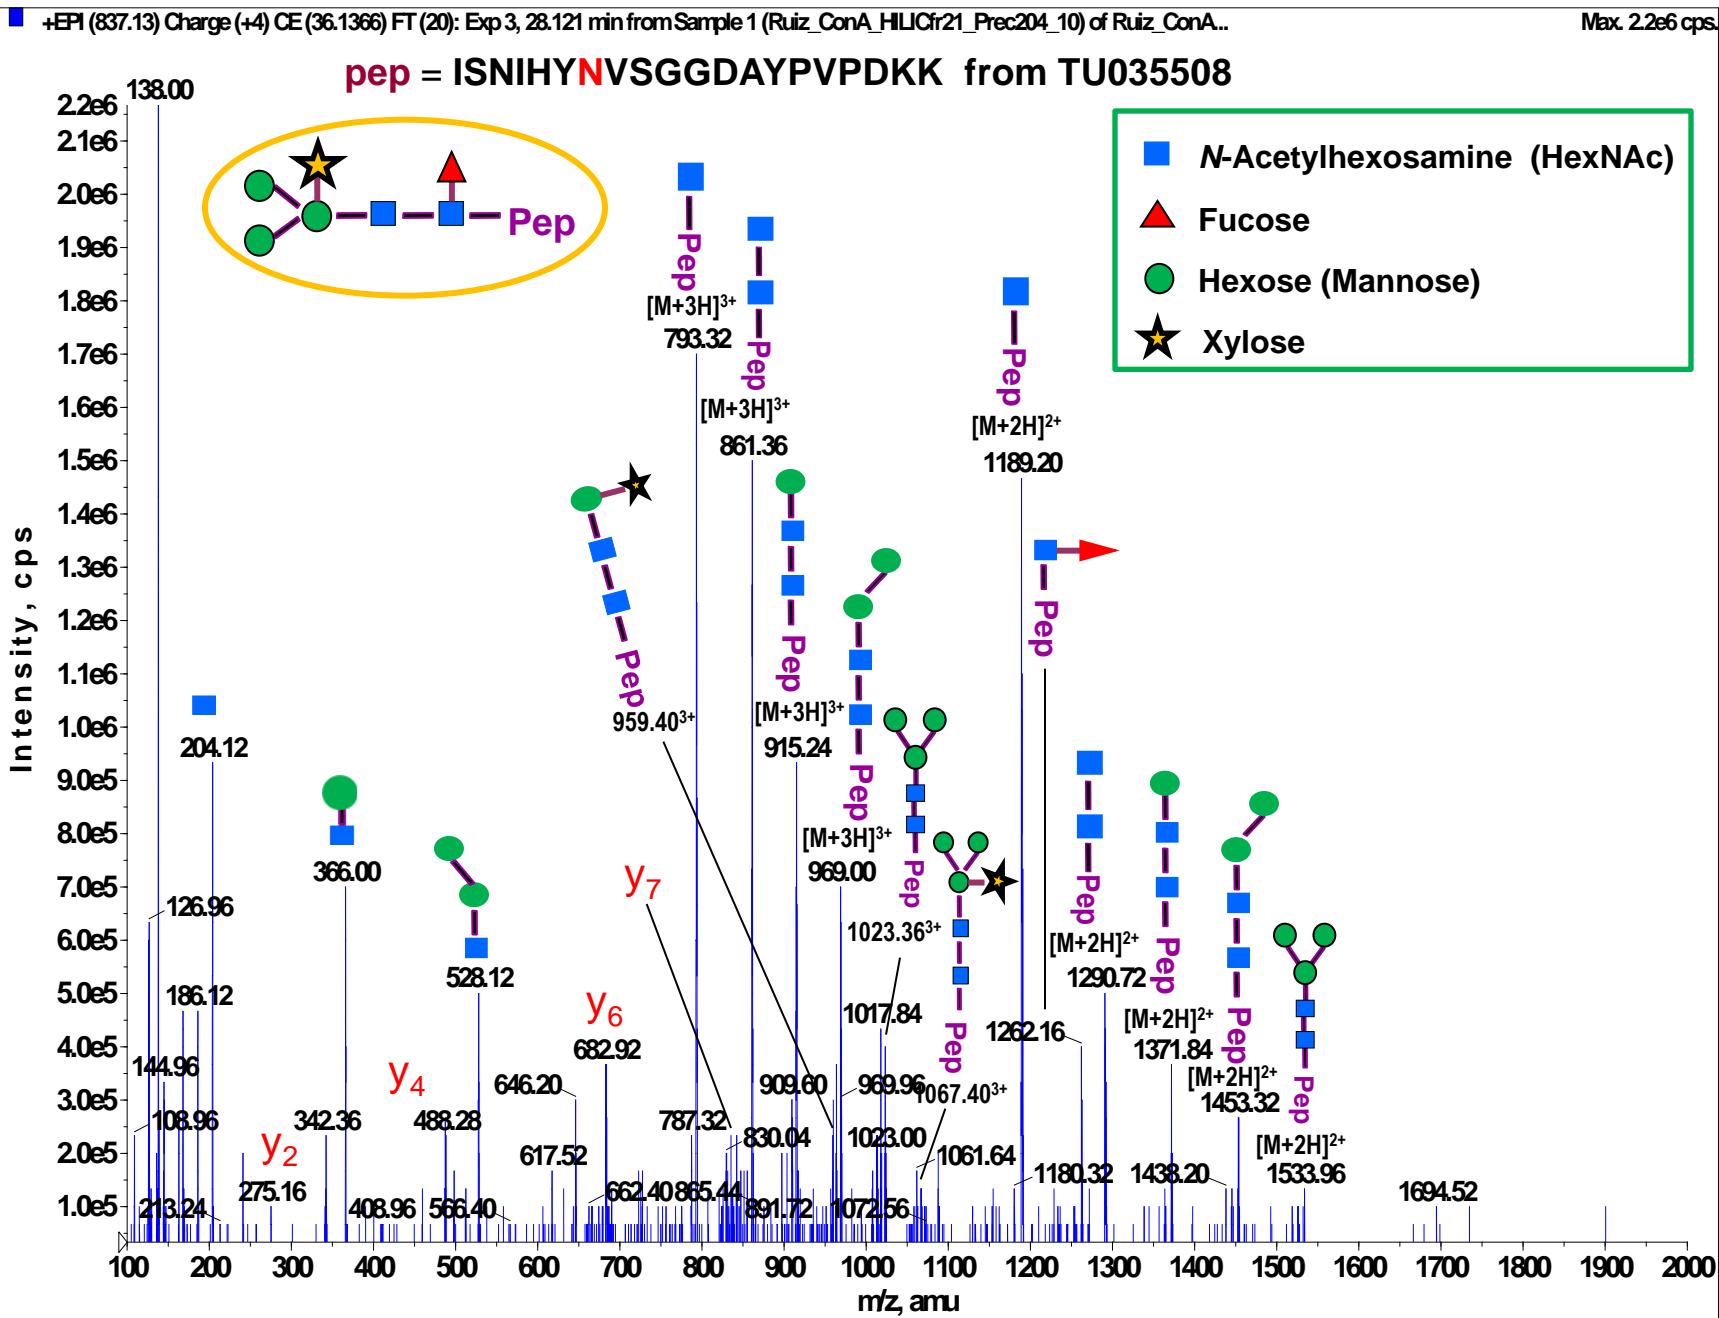

# TU010189

■ +EPI (1114.02) Charge (+2) CE (60.587) FT (20): Exp 3, 33.023 to 33.186 min from Sample 1 (Ruiz\_ConA\_HILICr18\_Prec204\_07) of R...

Max. 5.7e5 cps.

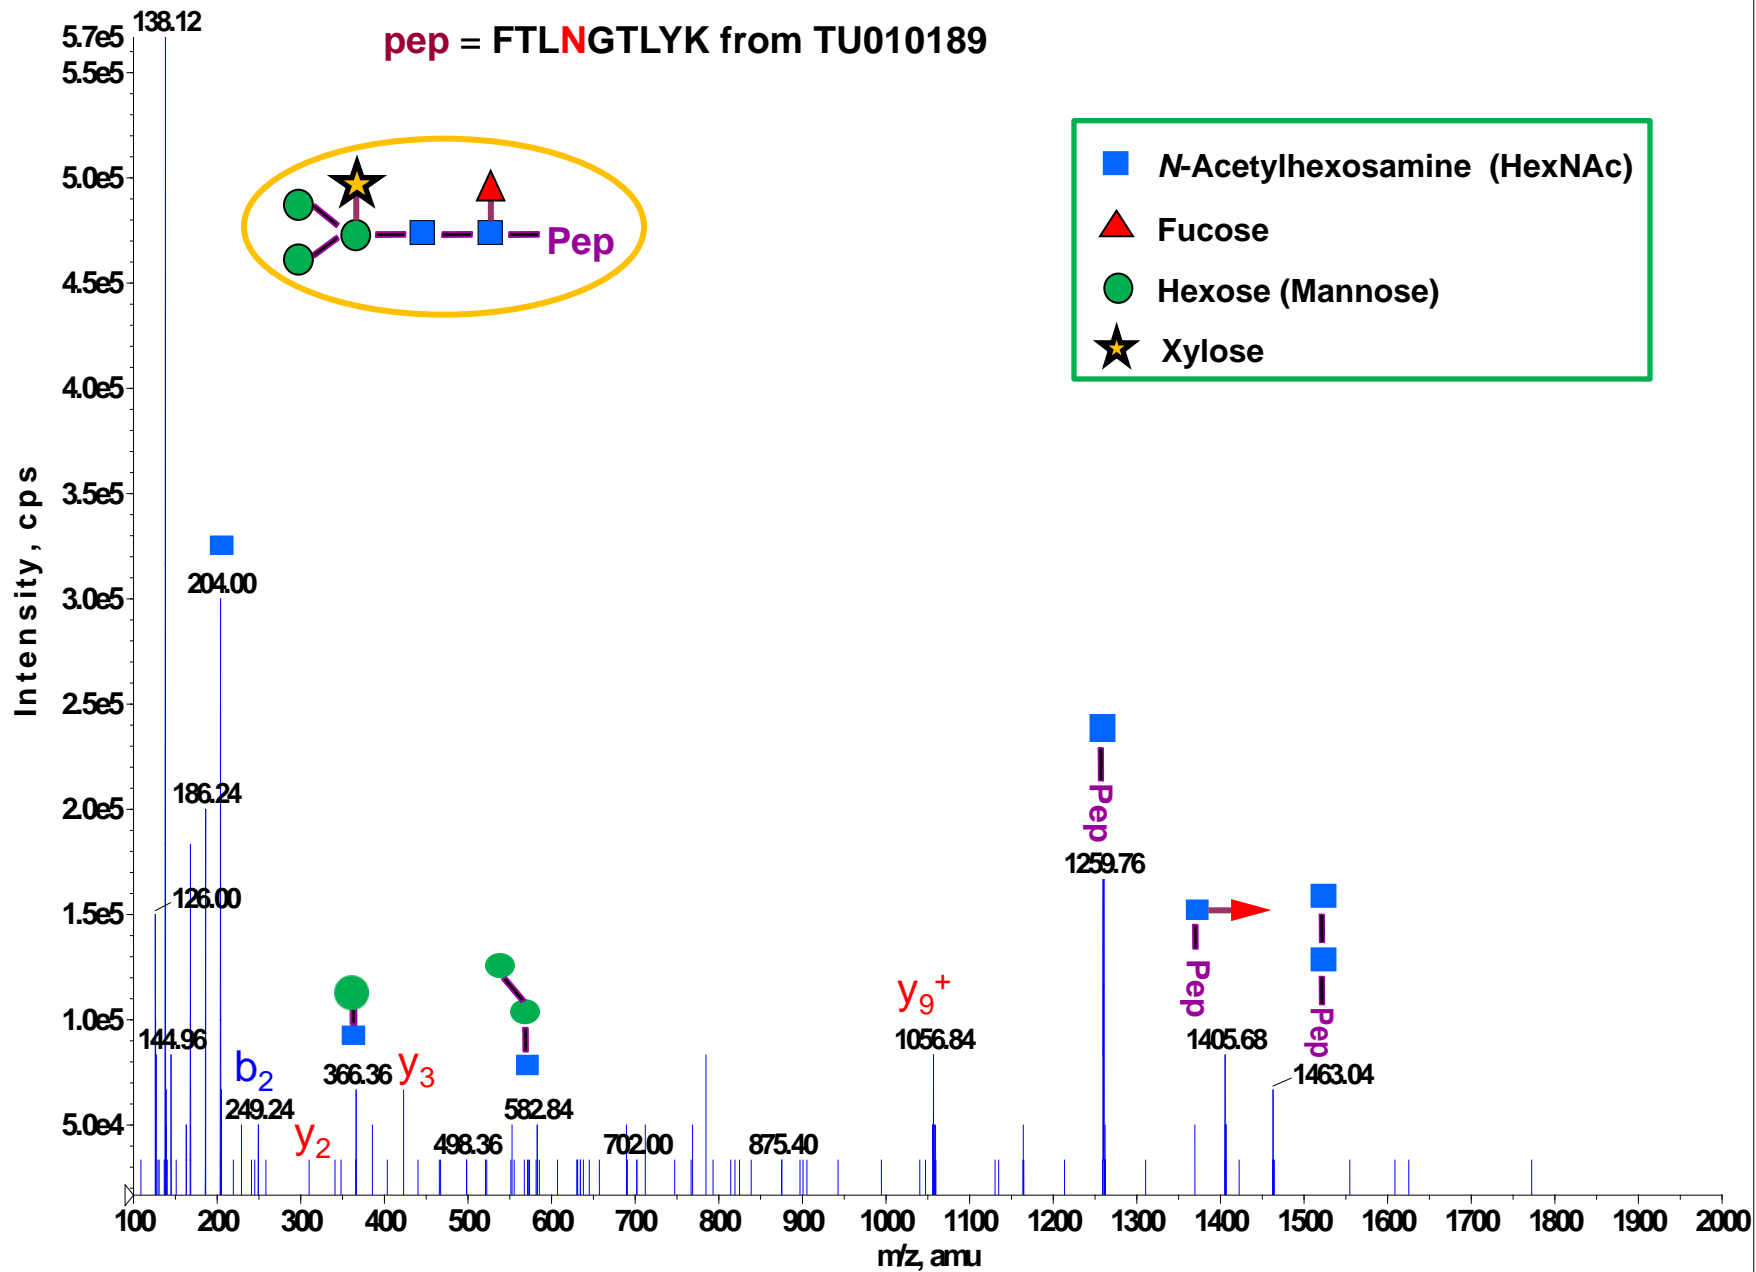

# TU043211

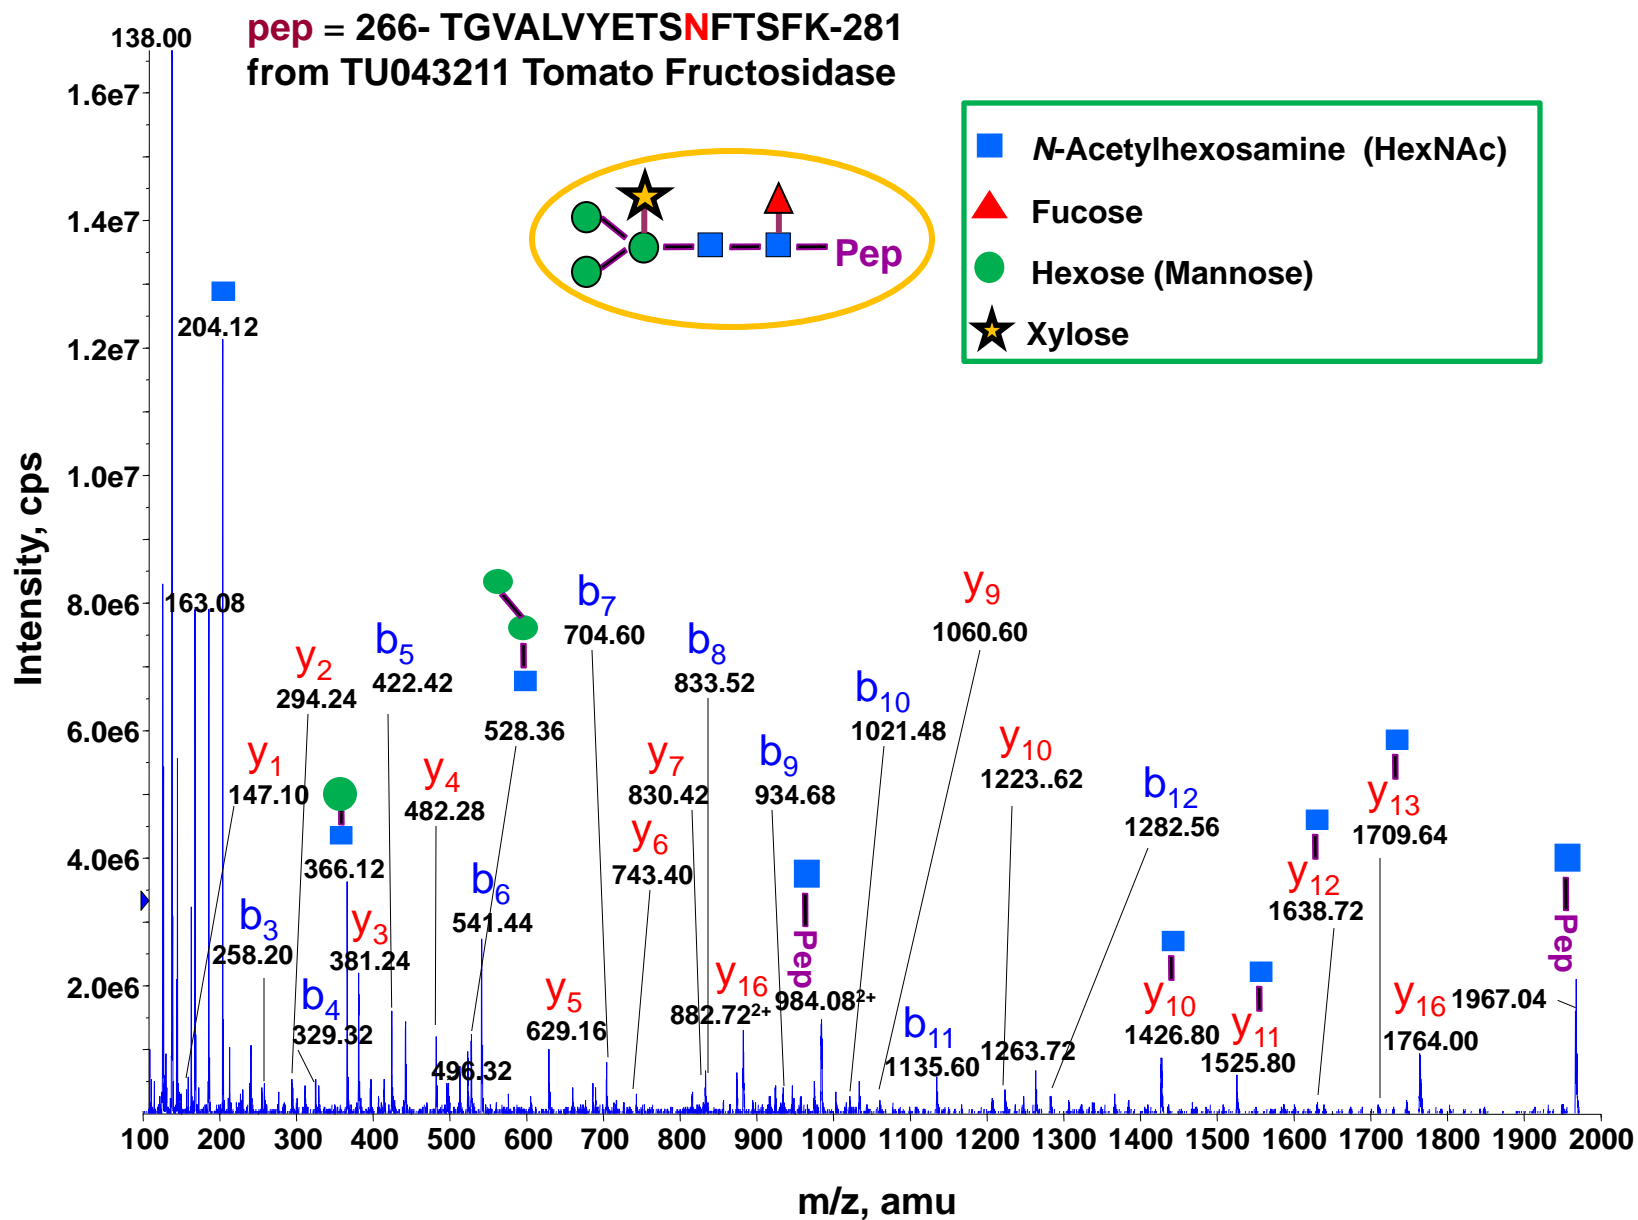

# TU016878

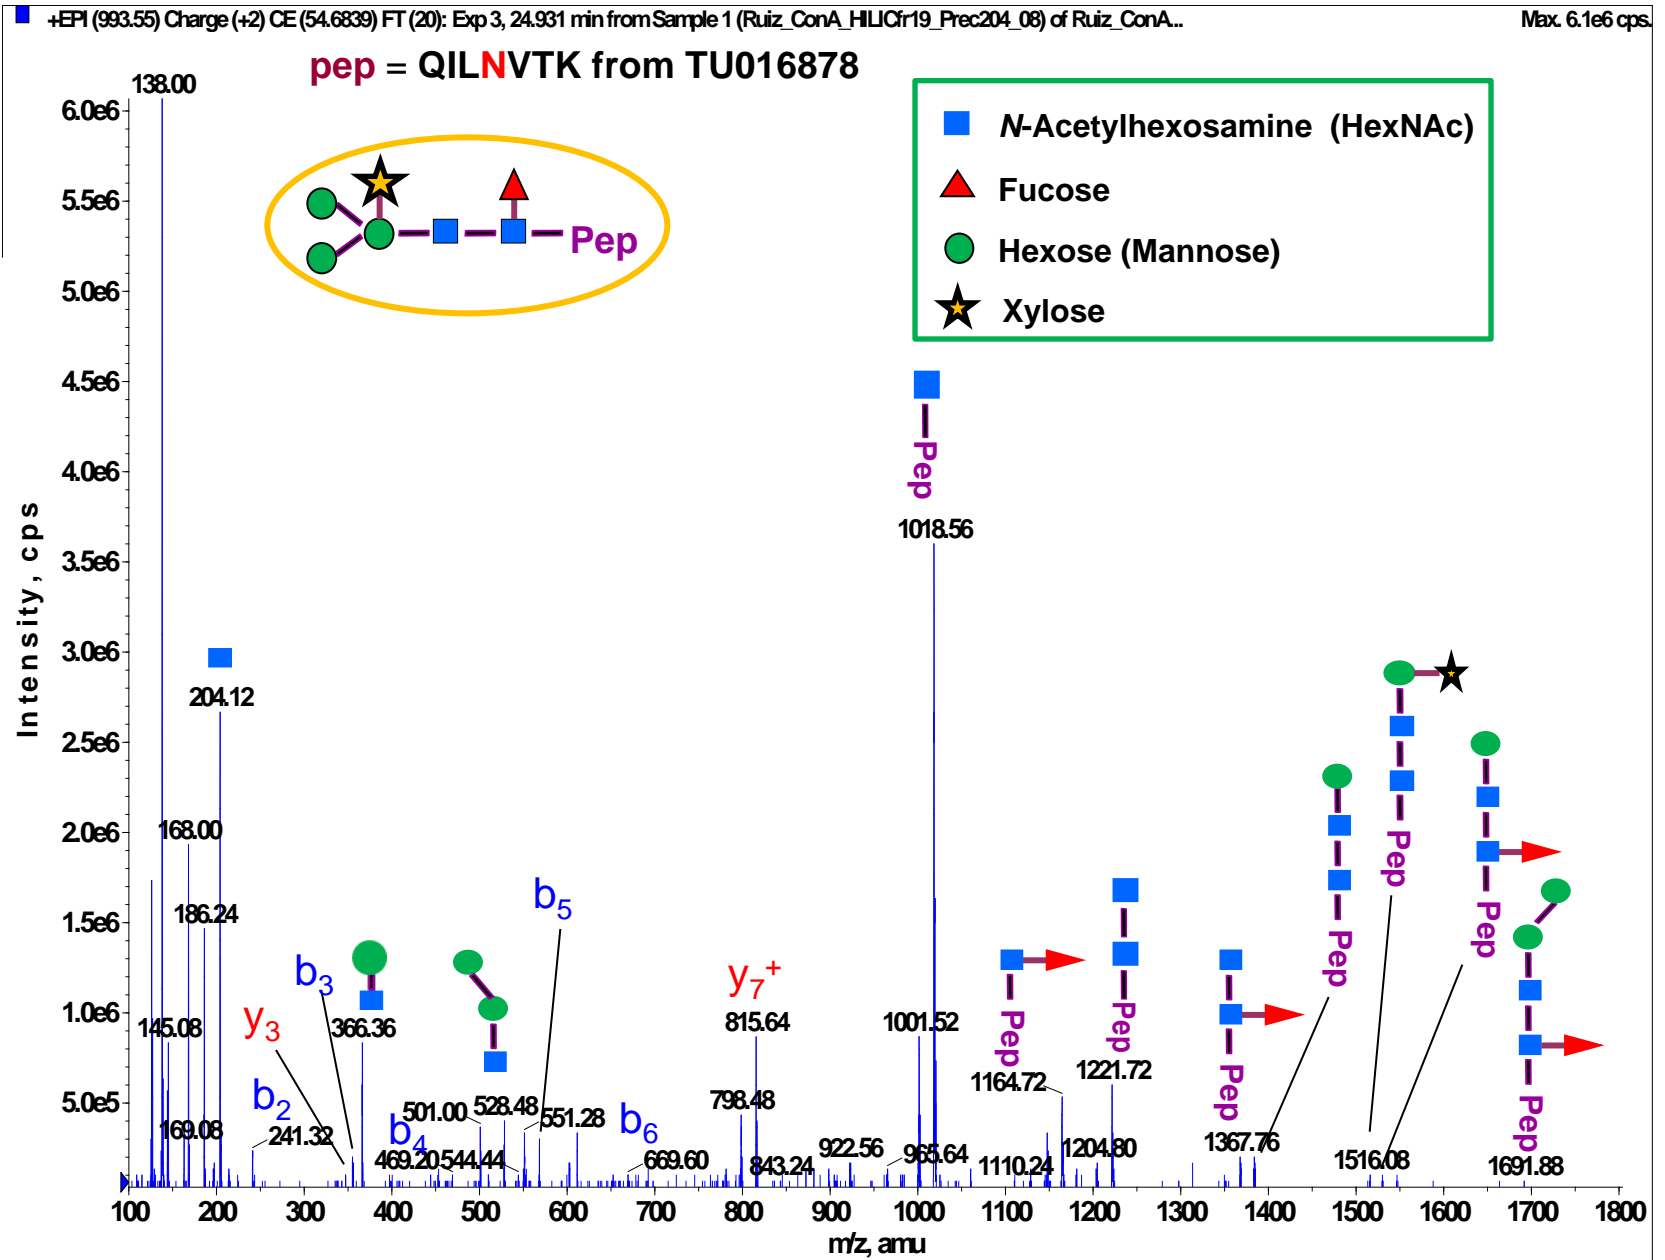

# TU016878

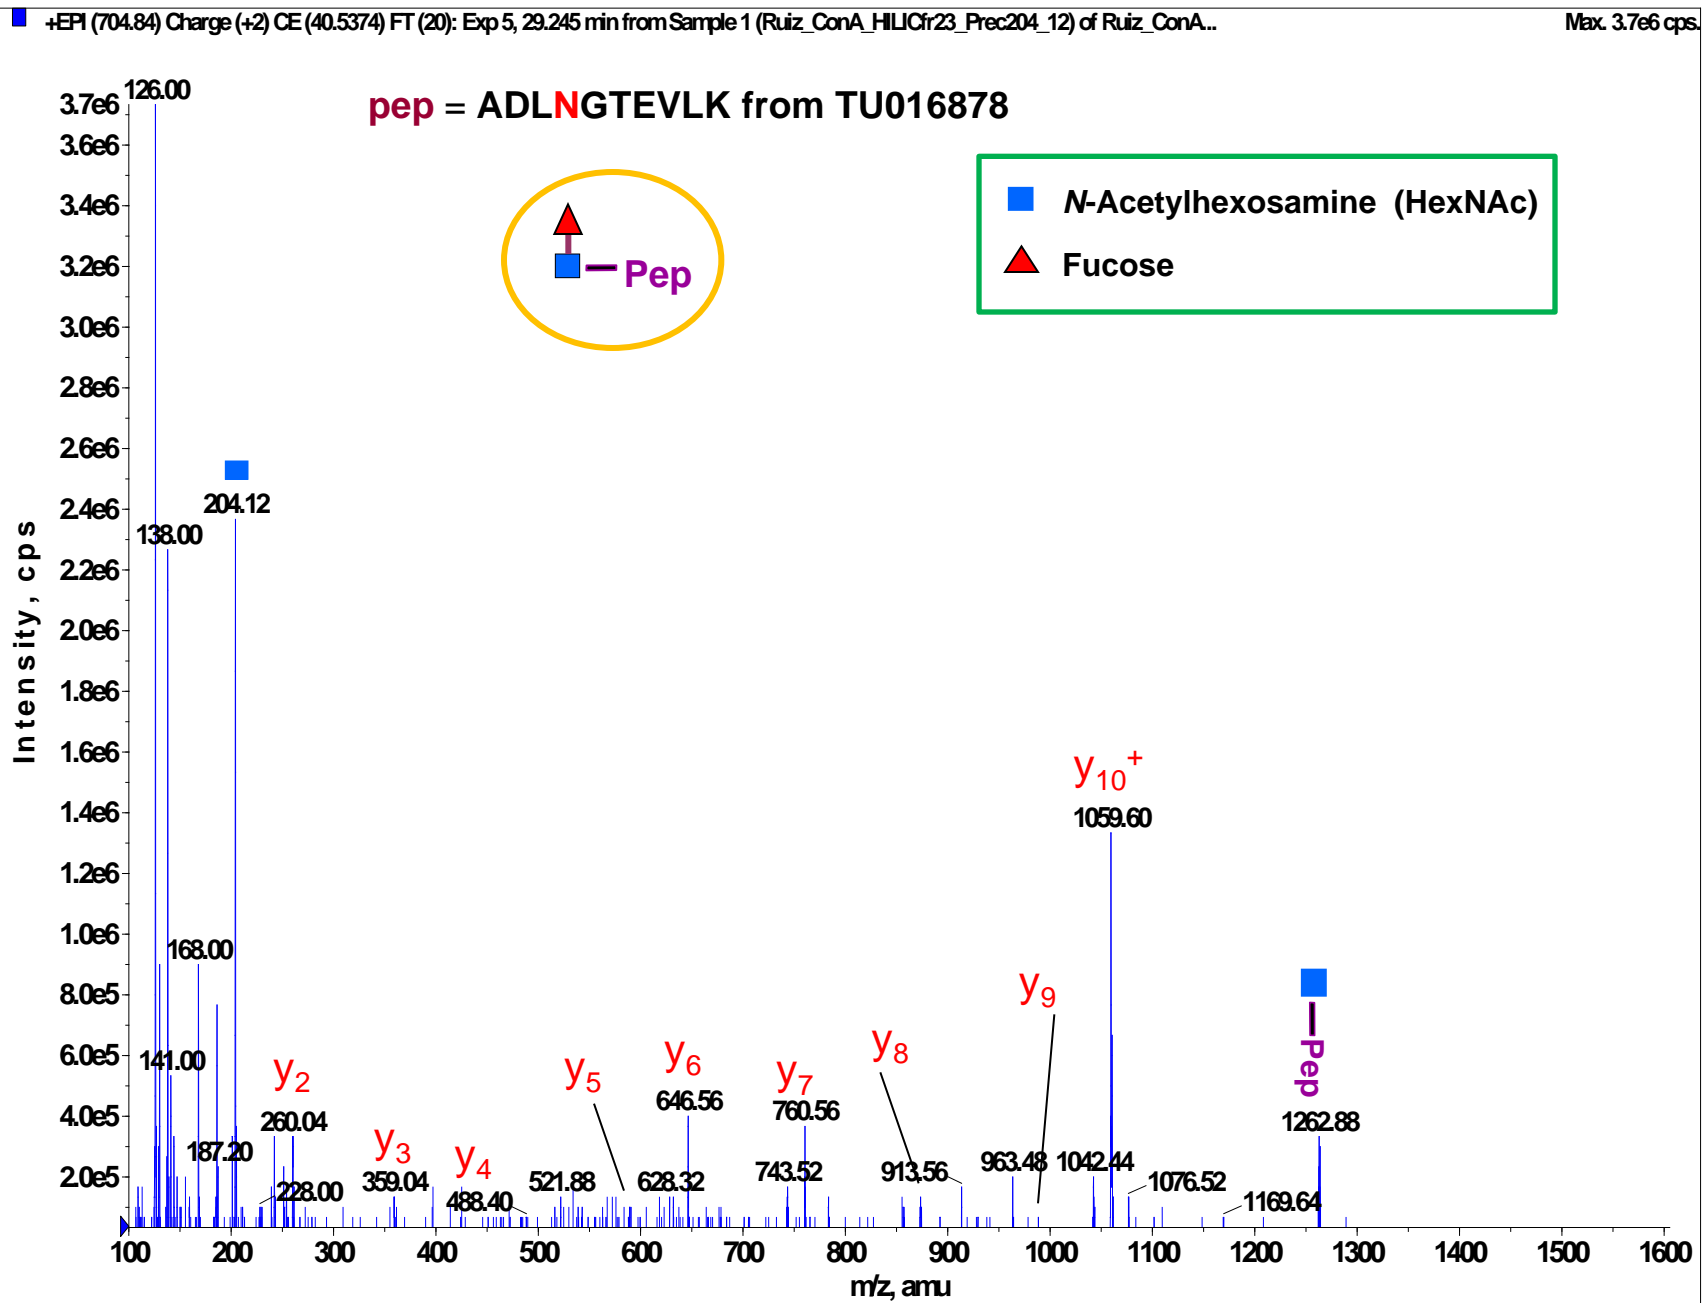

# TU016878

+EPI (806.44) Charge (+2) CE (45.5155) FT (20): Exp 3, 28.924 min from Sample 1 (Ruiz\_ConA\_HILICfr24\_Prec204\_13) of Ruiz\_ConA...

Max. 8.8e6 cps

pep = ADLNGTEVLK from TU016878

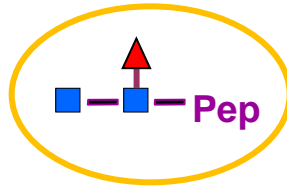

Legend:

- N-Acetylhexosamine (HexNAc)
- ▲ Fucose

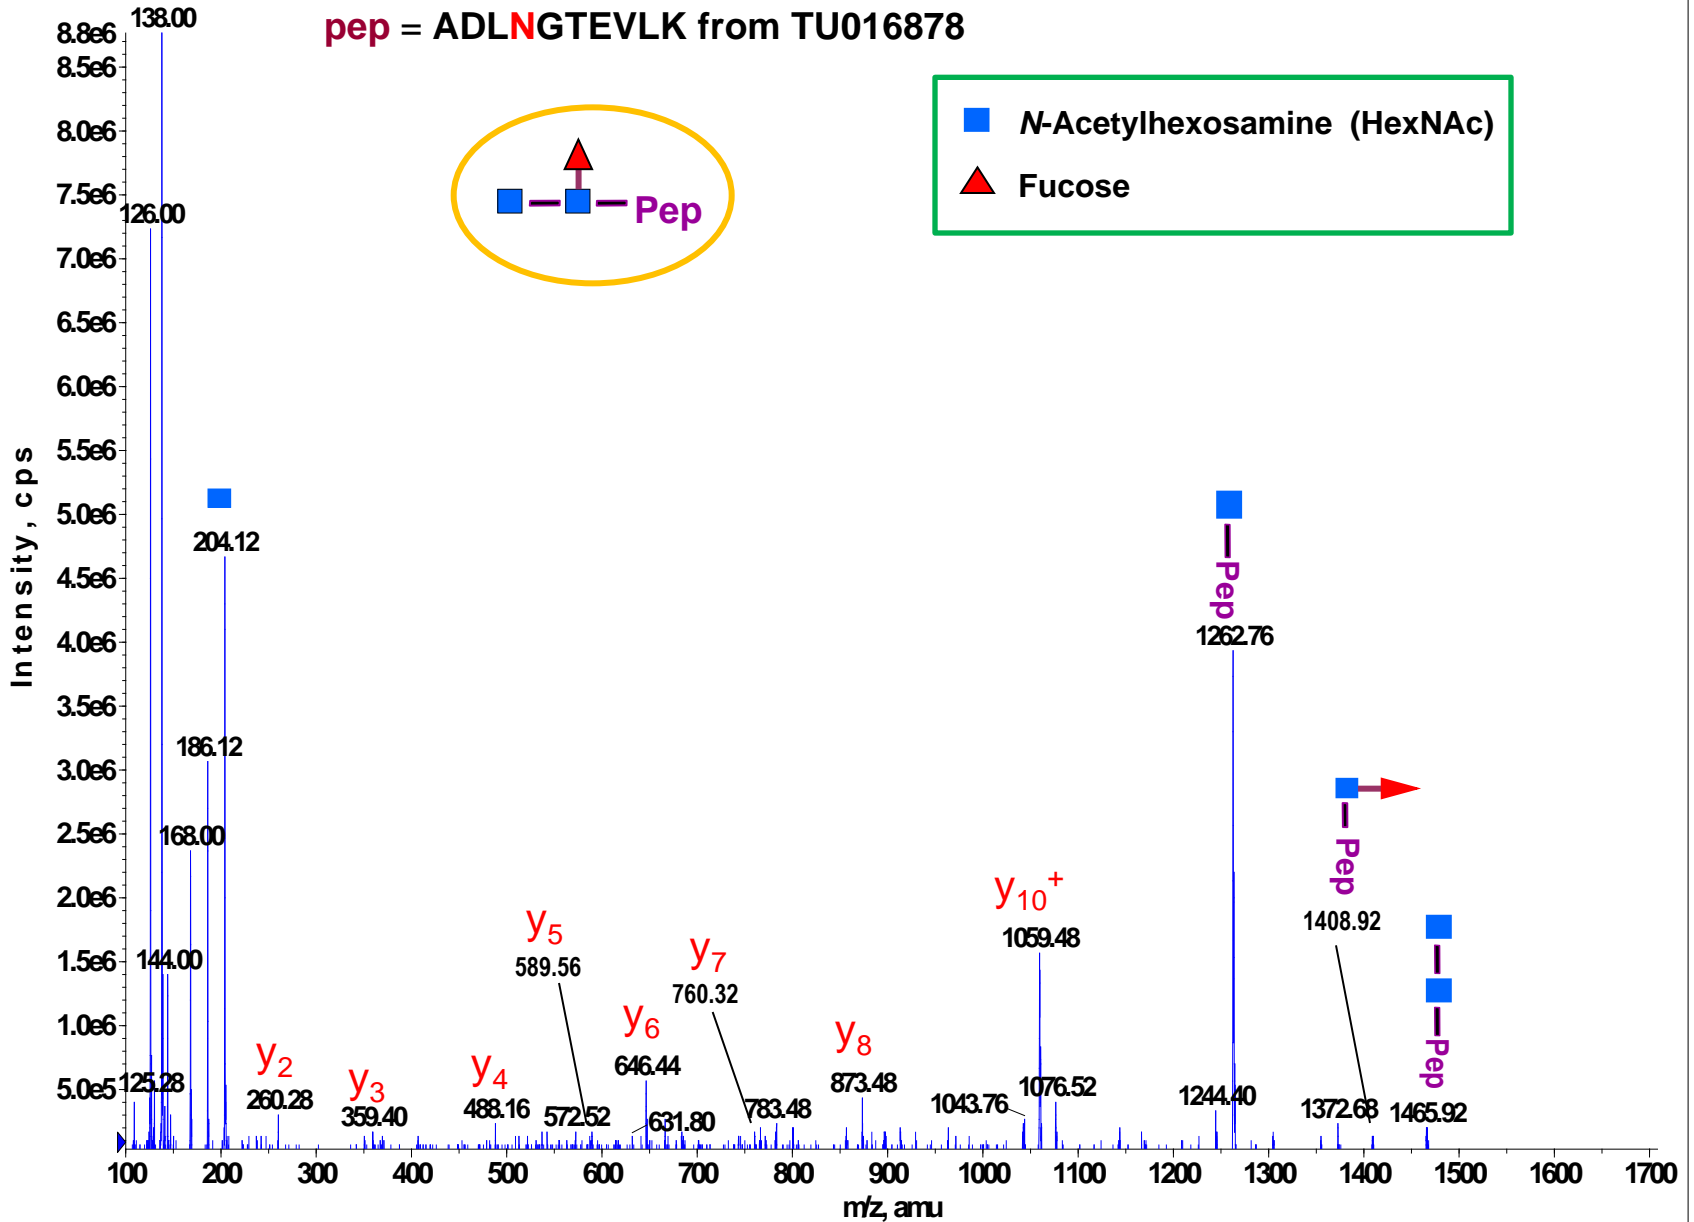

# TU016878

+EPI (744.41) Charge (+3) CE (37.2653) FT (20): Exp 4, 29.259 min from Sample 1 (Ruiz\_ConA\_HILICfr26\_Prec204\_15) of Ruiz\_ConA...

Max. 1.0e7 cps

pep = ADLNGTEVLK from TU016878

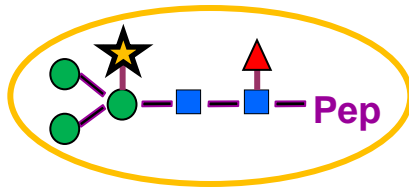

- N-Acetylhexosamine (HexNAc)
- ▲ Fucose
- Hexose (Mannose)
- ★ Xylose

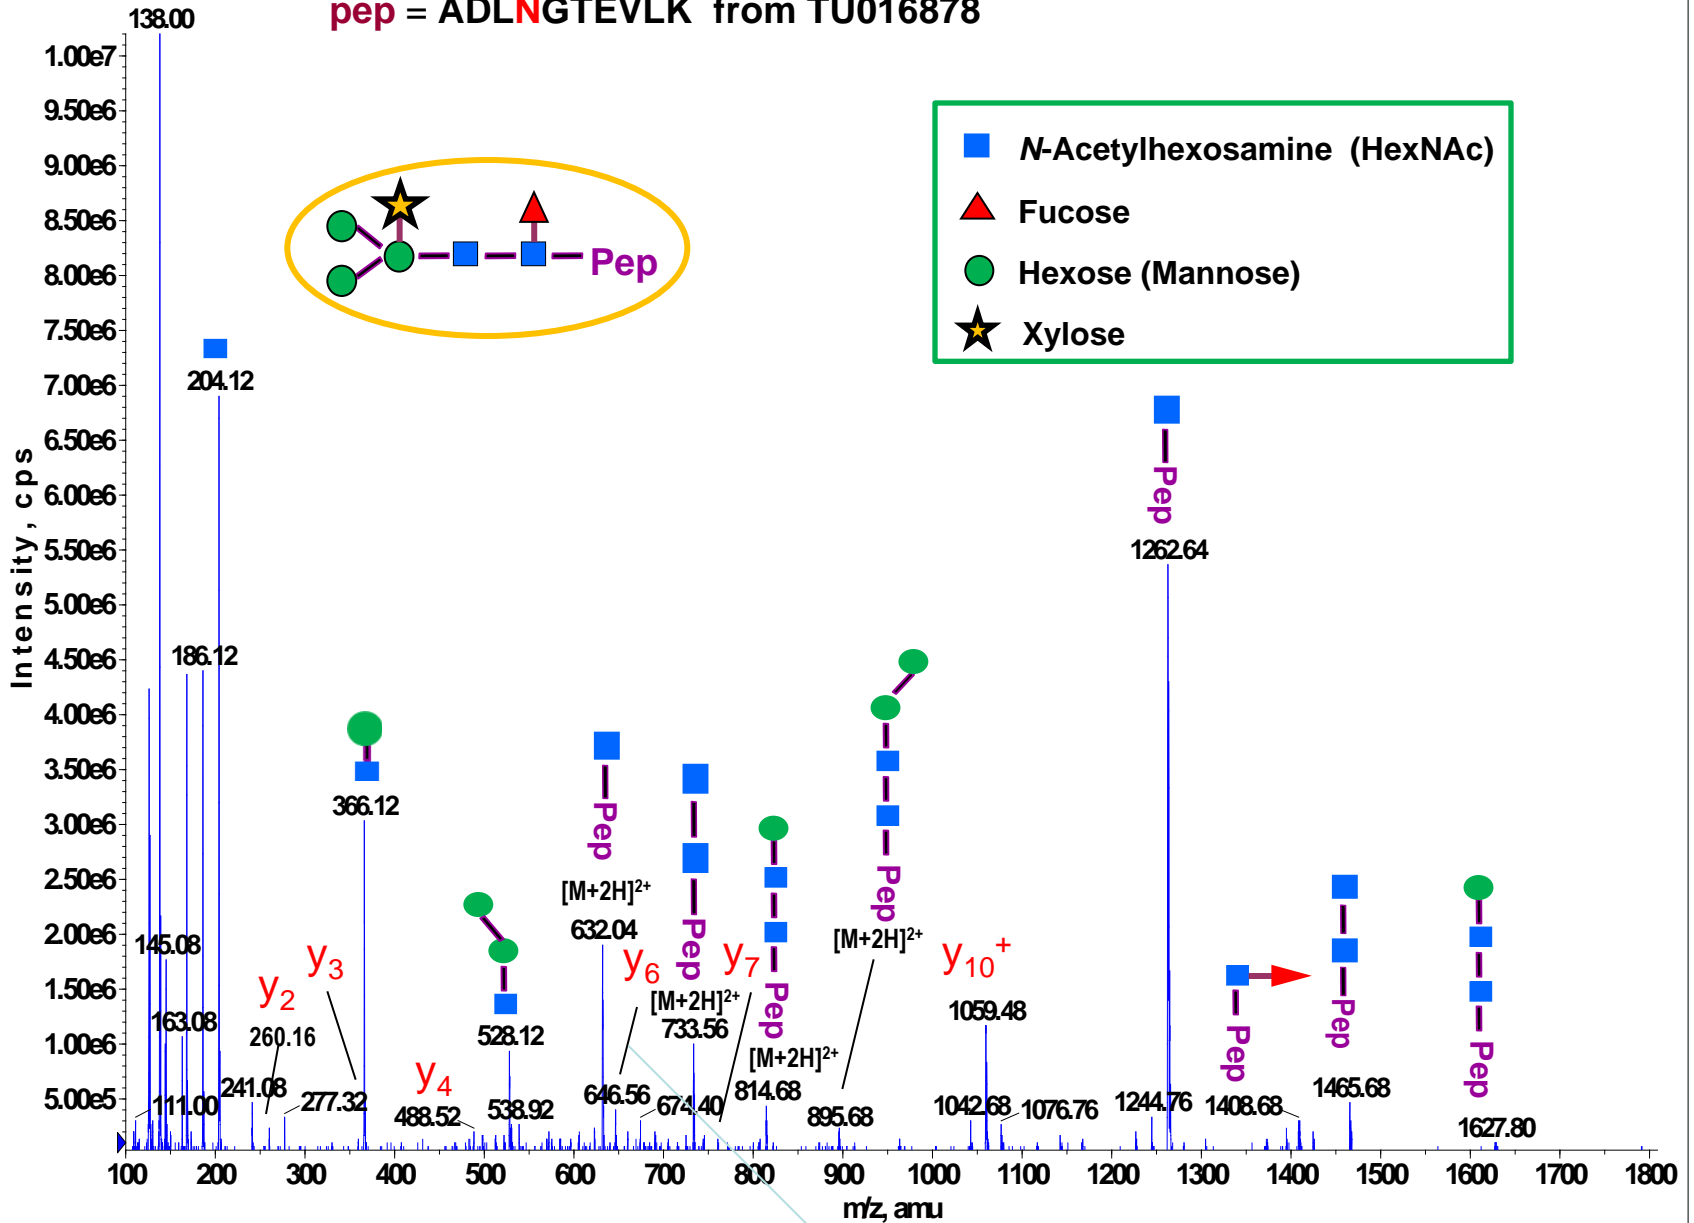

# TU039462

+EPI (838.33) Charge (+3) CE (41.2098) FT (20): Exp 3, 29.492 min from Sample 1 (Ruiz\_ConA\_HILICfr21\_Prec204\_10) of Ruiz\_ConA...

Max. 8.5e6 cps.

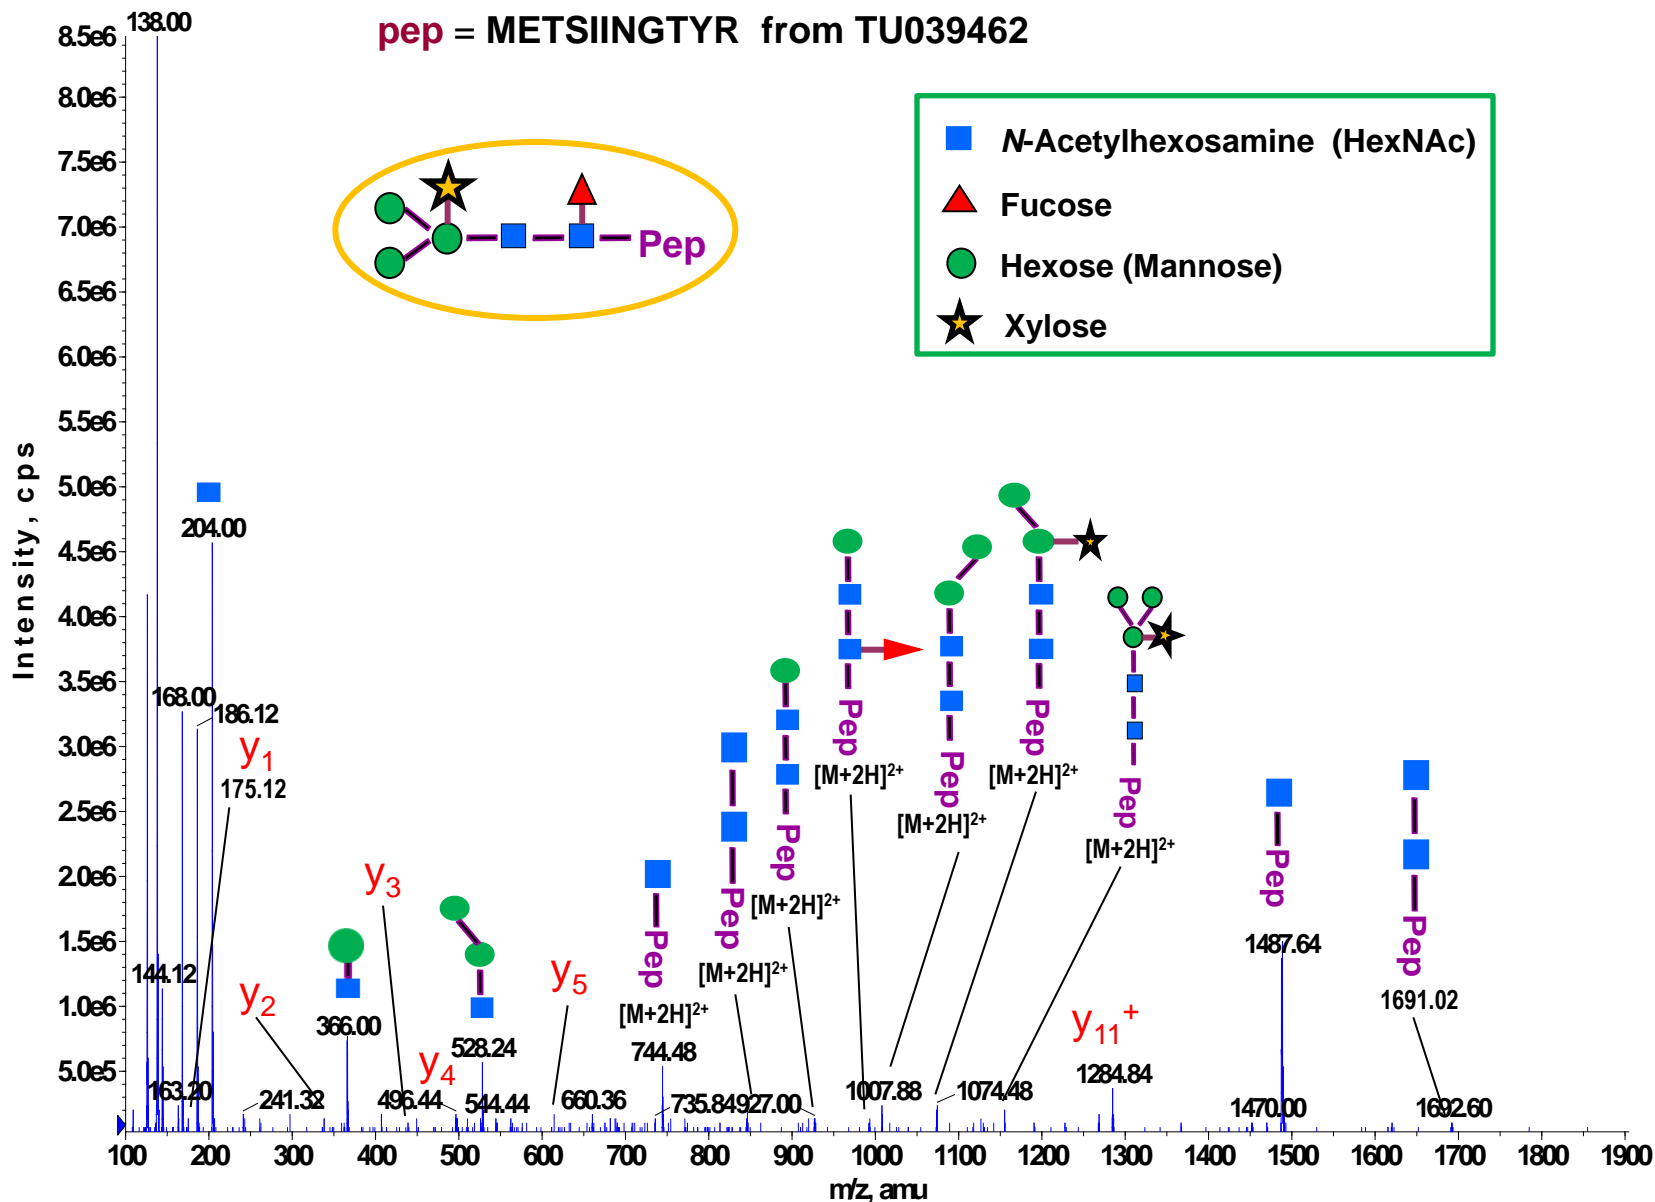



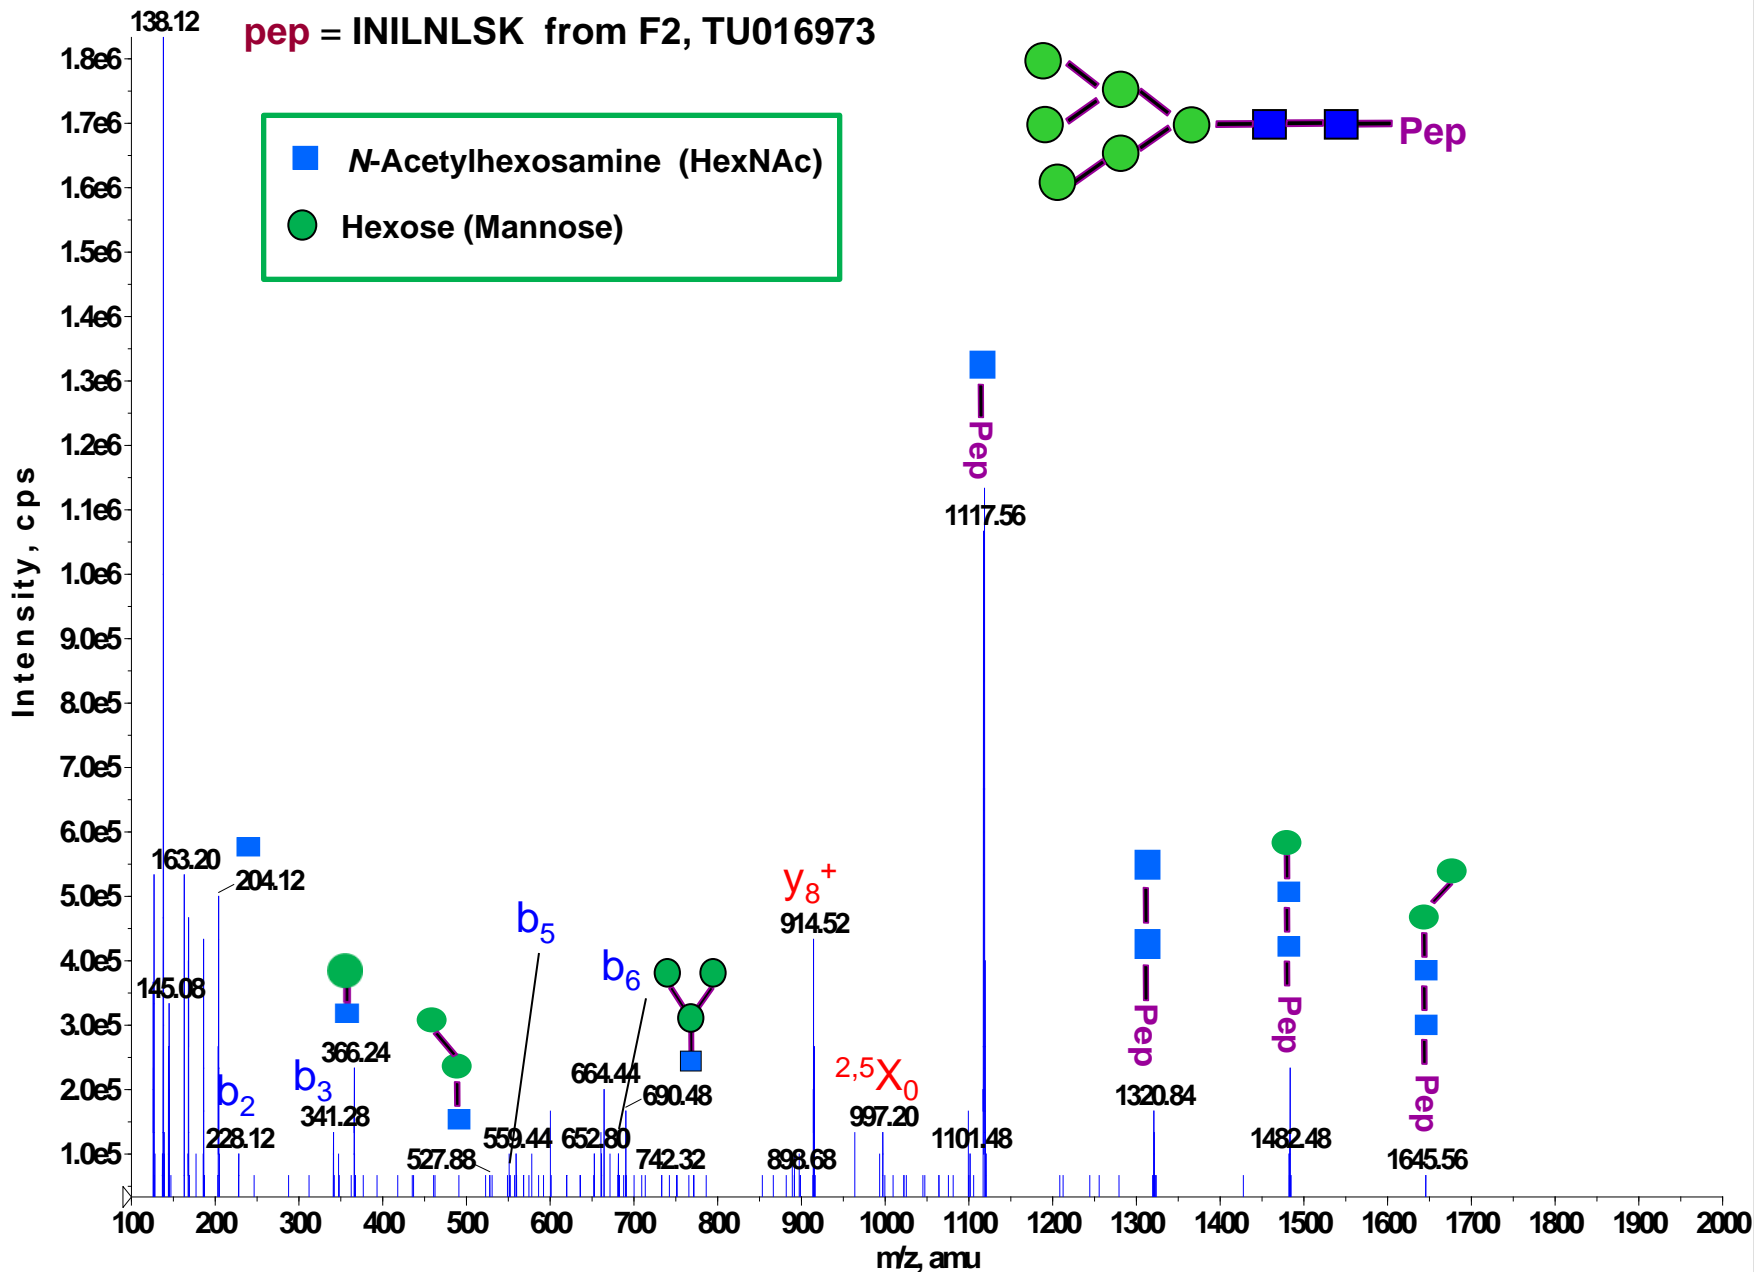

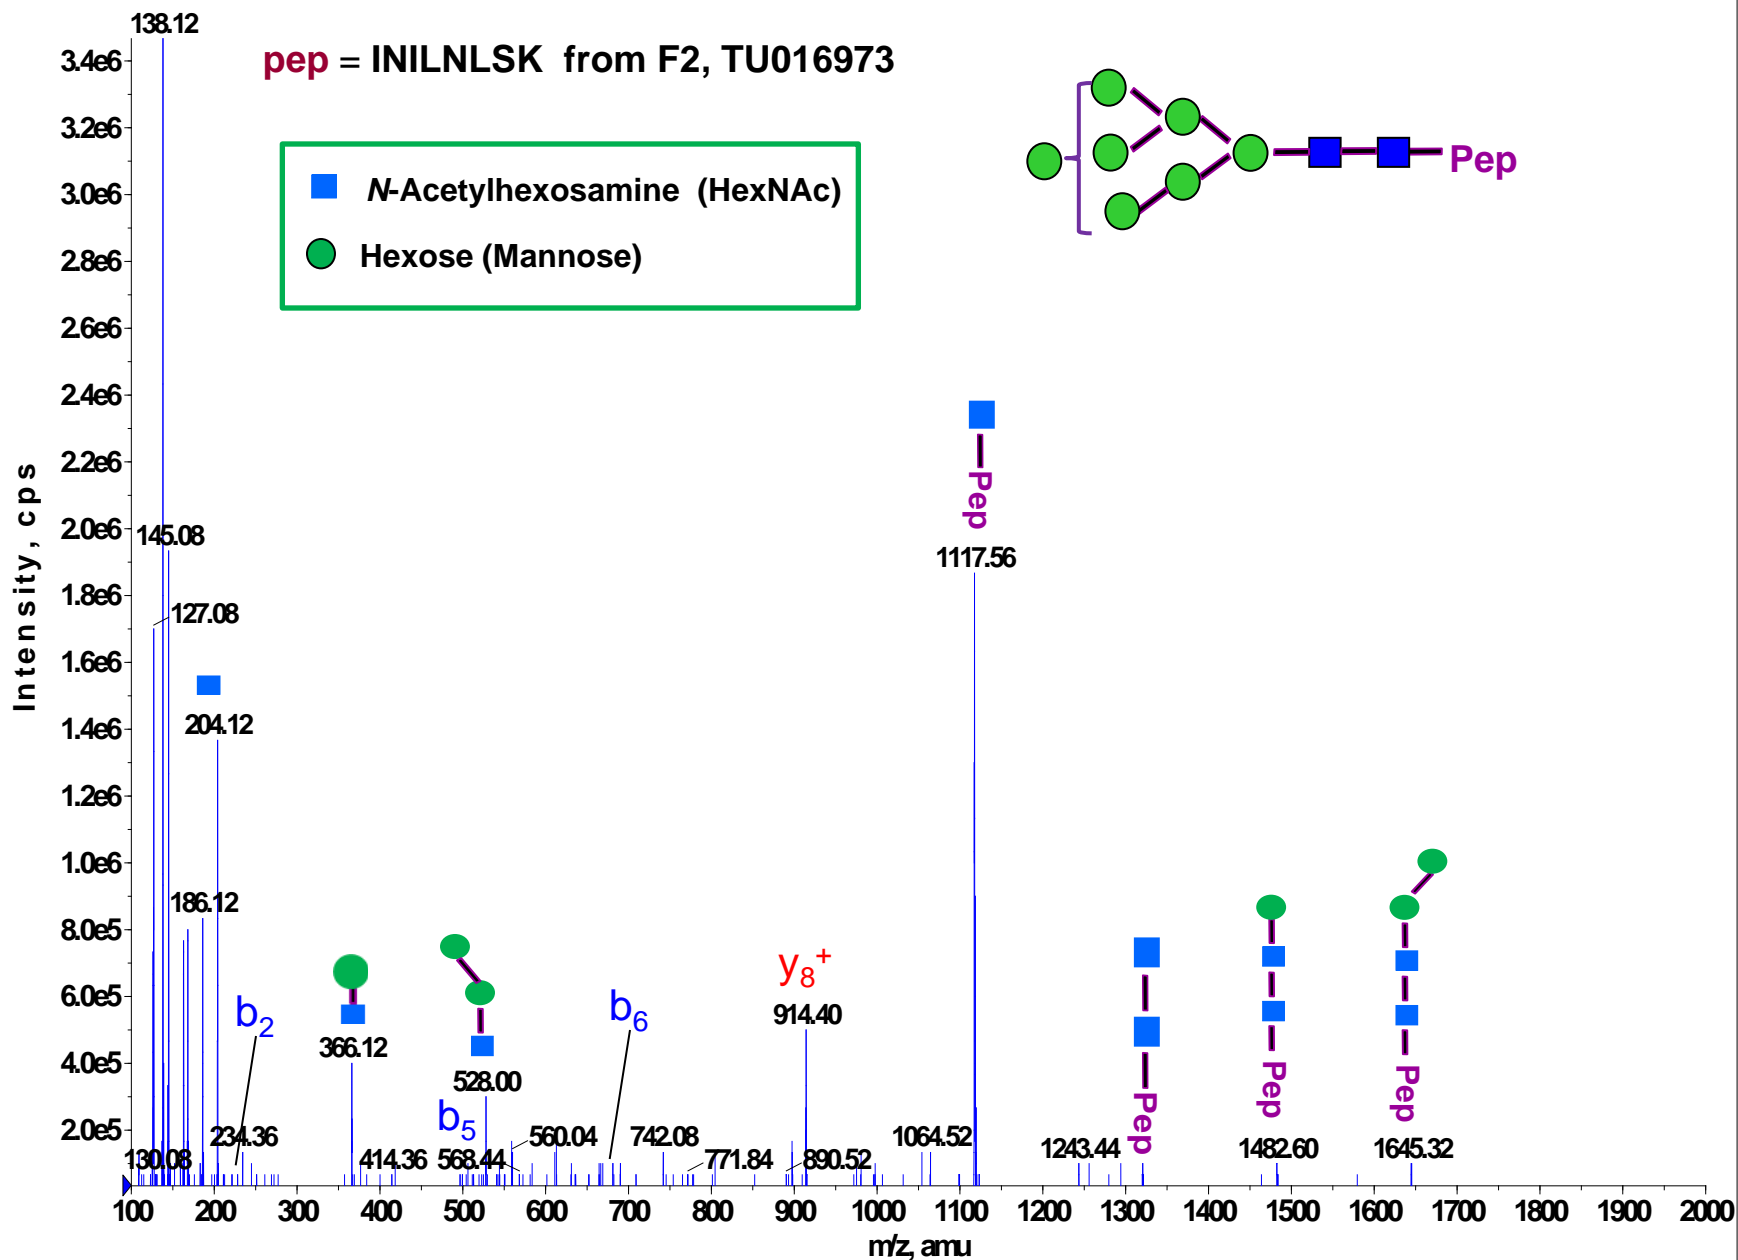

+EPI (789.28) Charge +3 44.6747 FT (20): Exp 3, 26.548 min from Sample 1 (Ruiz\_GNA\_HILICpool3\_13) of Ruiz\_GNA\_HILICpo... Max. 6.6e6 cps.

pep = NEFNITPR from TU004342

Legend:

- *N*-Acetylhexosamine (HexNAc)
- ▲ Fucose
- Hexose (Mannose)
- ★ Xylose

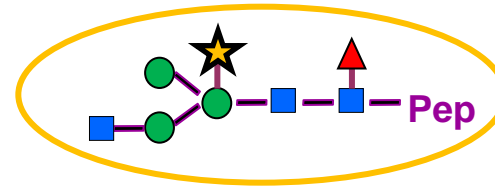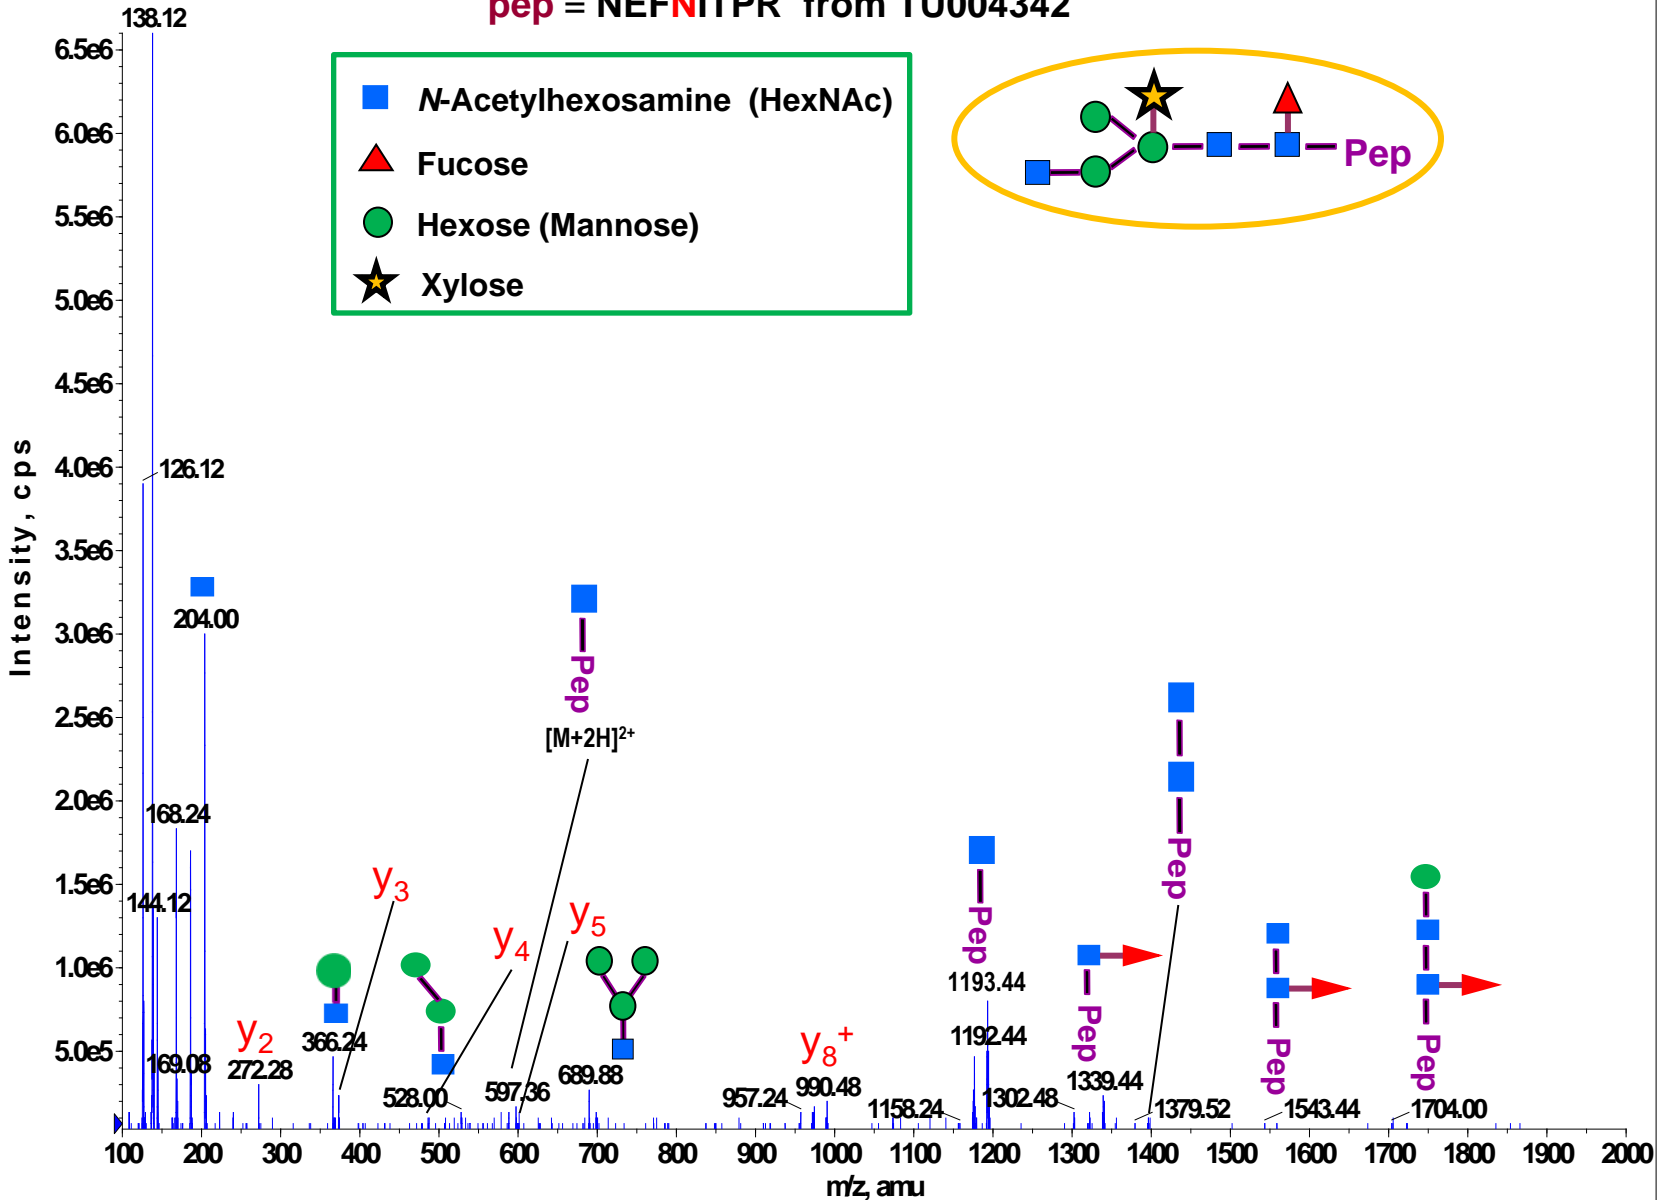

pep = NEFNITPR from TU004342

- *N*-Acetylhexosamine (HexNAc)
- ▲ Fucose
- Hexose (Mannose)
- ★ Xylose

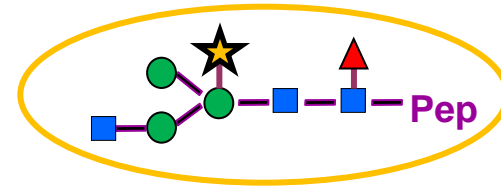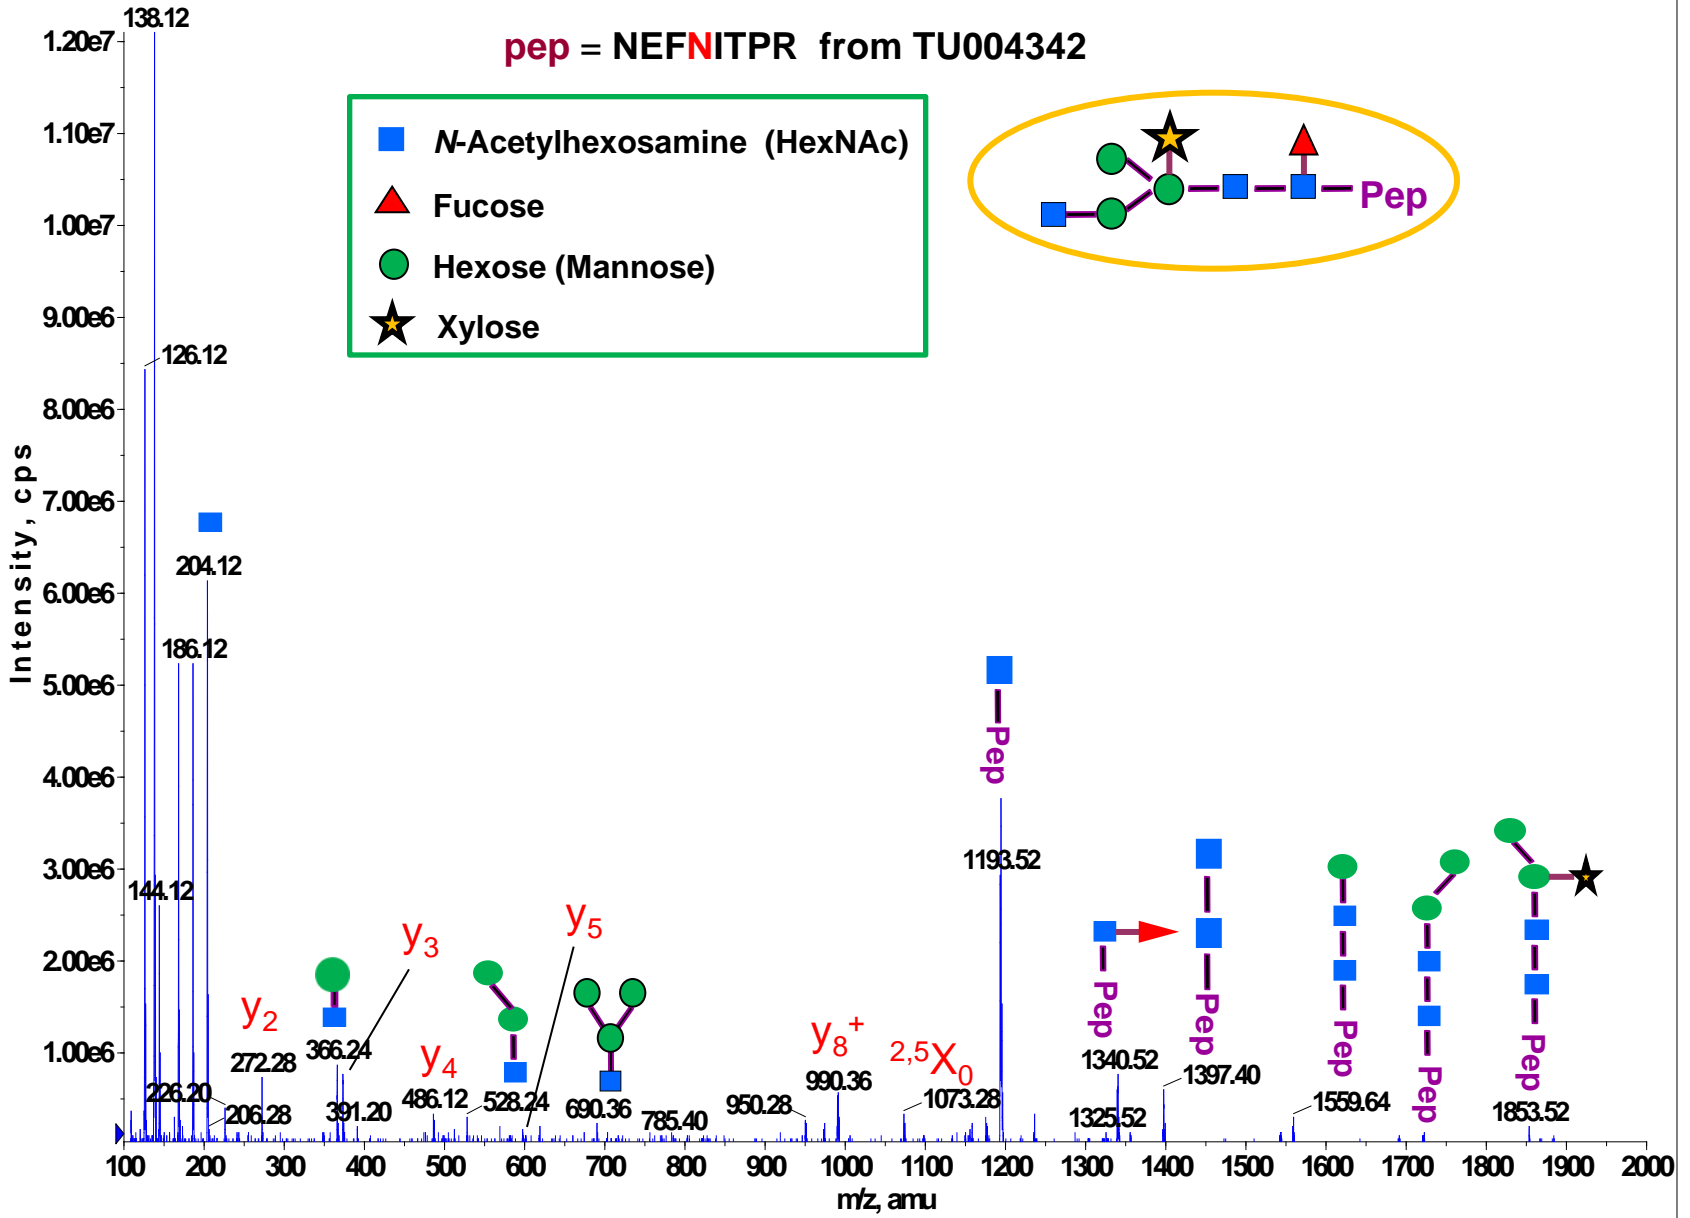

pep = NEFNITPR from TU004342

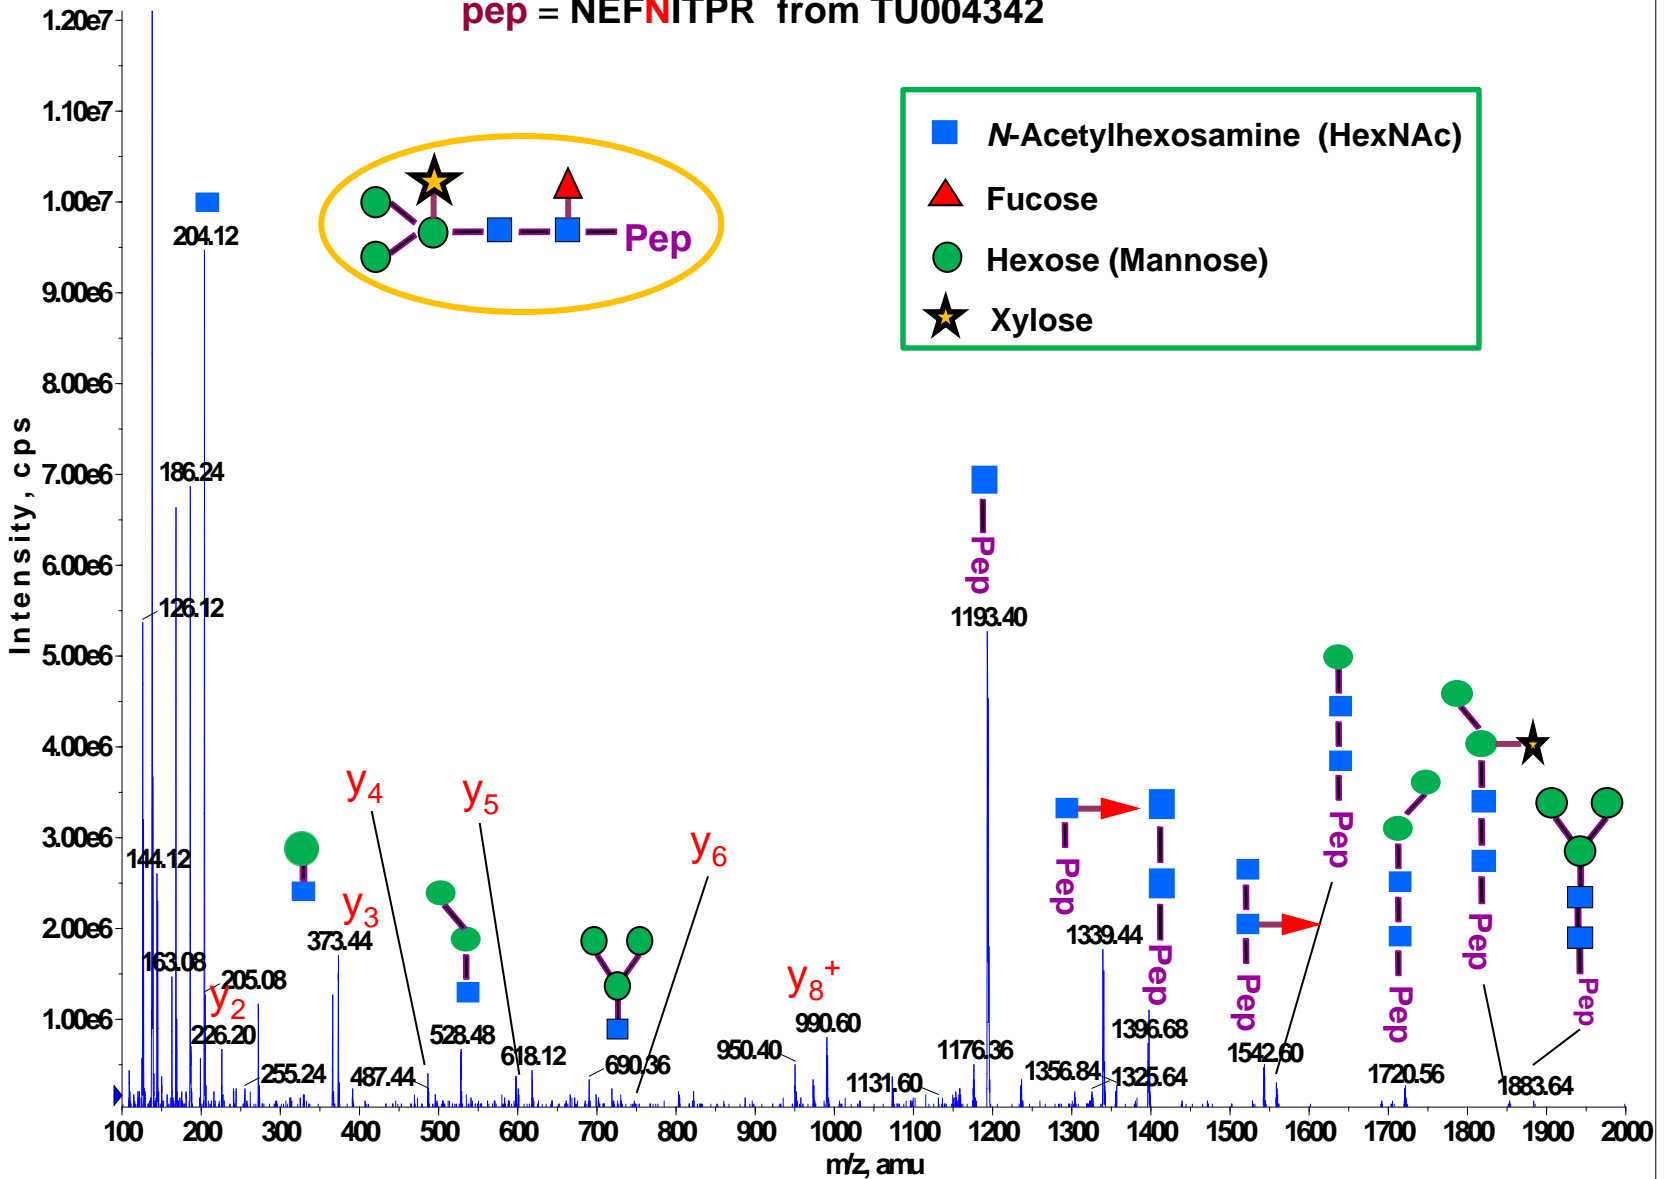

pep = METSIINGTYR from TU039462

Legend for glycan components:

- N-Acetylhexosamine (HexNAc)
- ▲ Fucose
- Hexose (Mannose)
- ★ Xylose

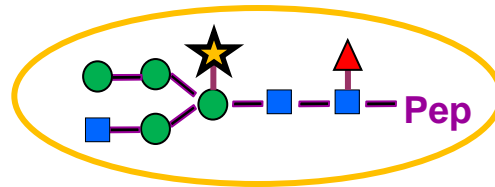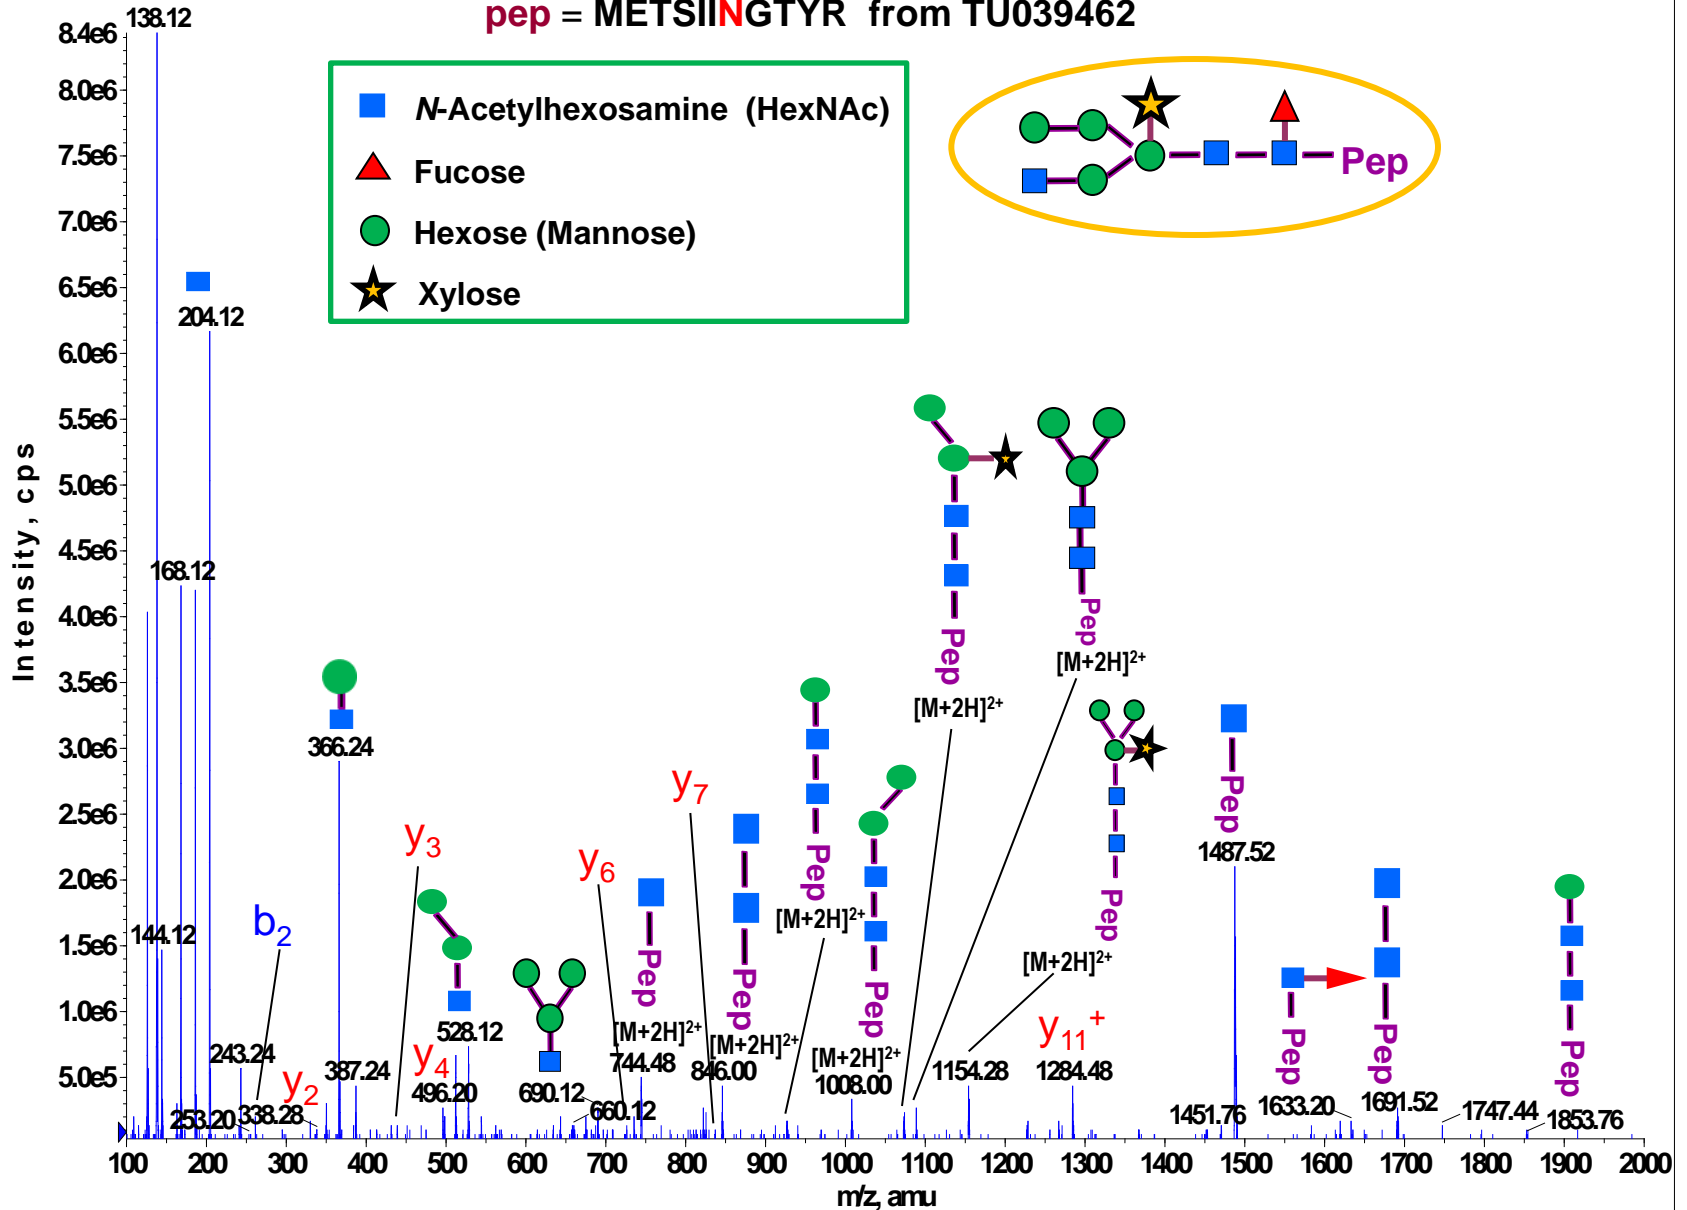

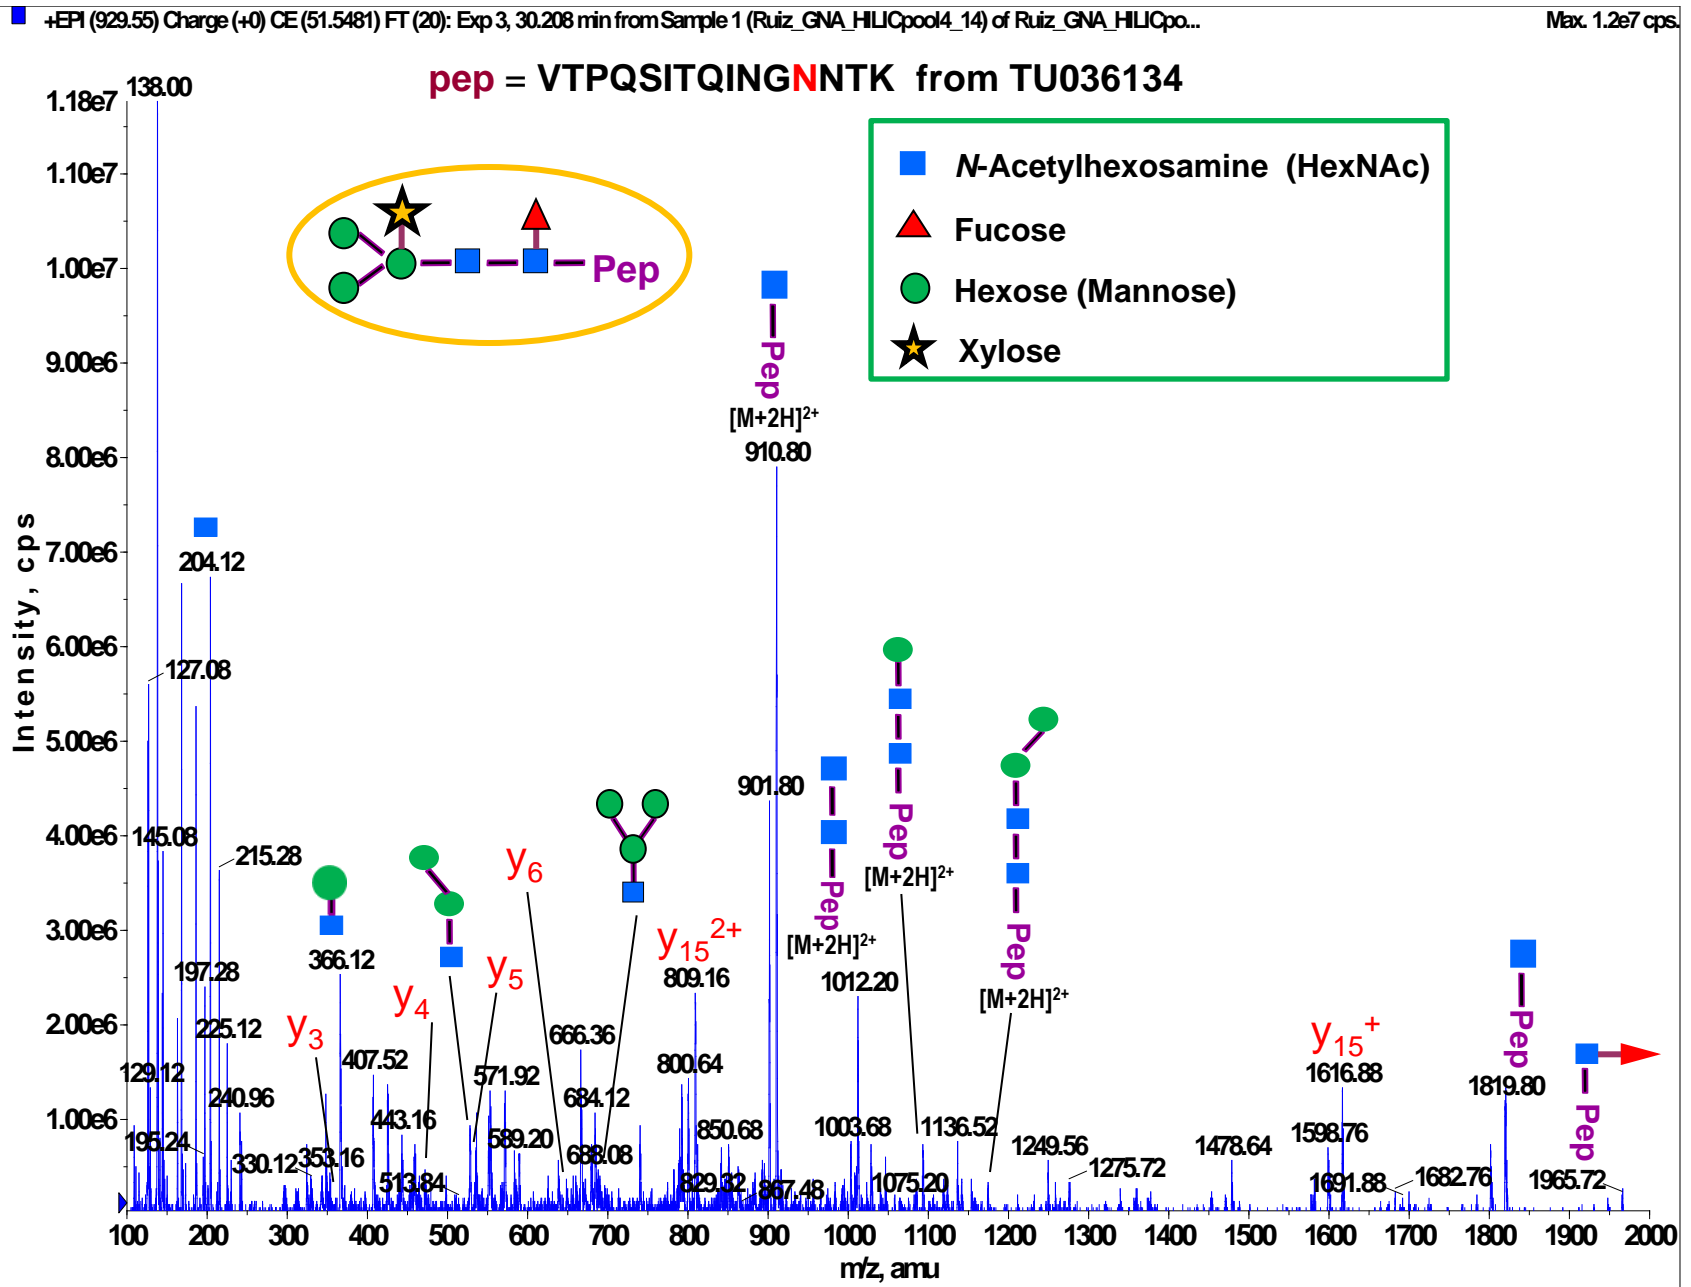

+EPI (871.47) Charge (+4) CE (37.3728) FT (20): Exp 3, 33.438 min from Sample 1 (Ruiz\_GNA\_HILICpool4\_14) of Ruiz\_GNA\_HILICpo... Max. 7.7e5 cps

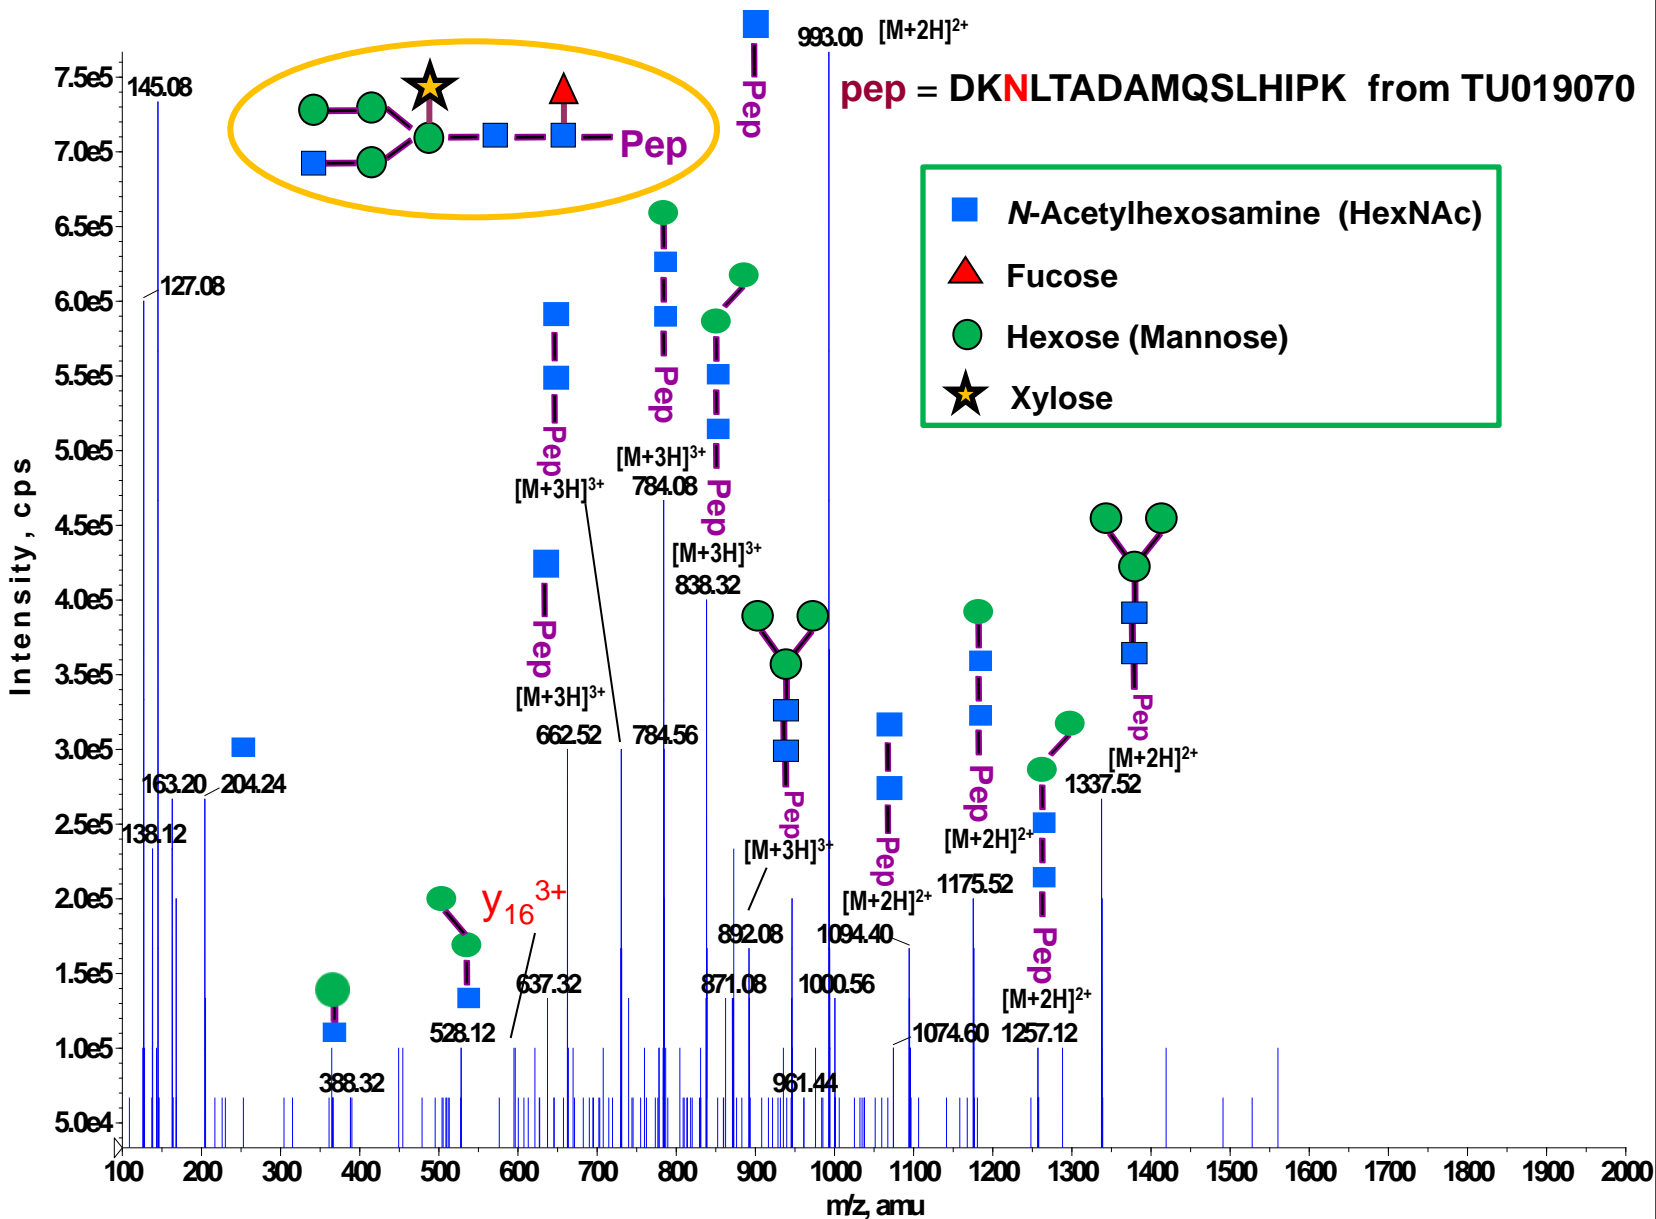



pep = 155-QQFNVTPR -162 from TU134197

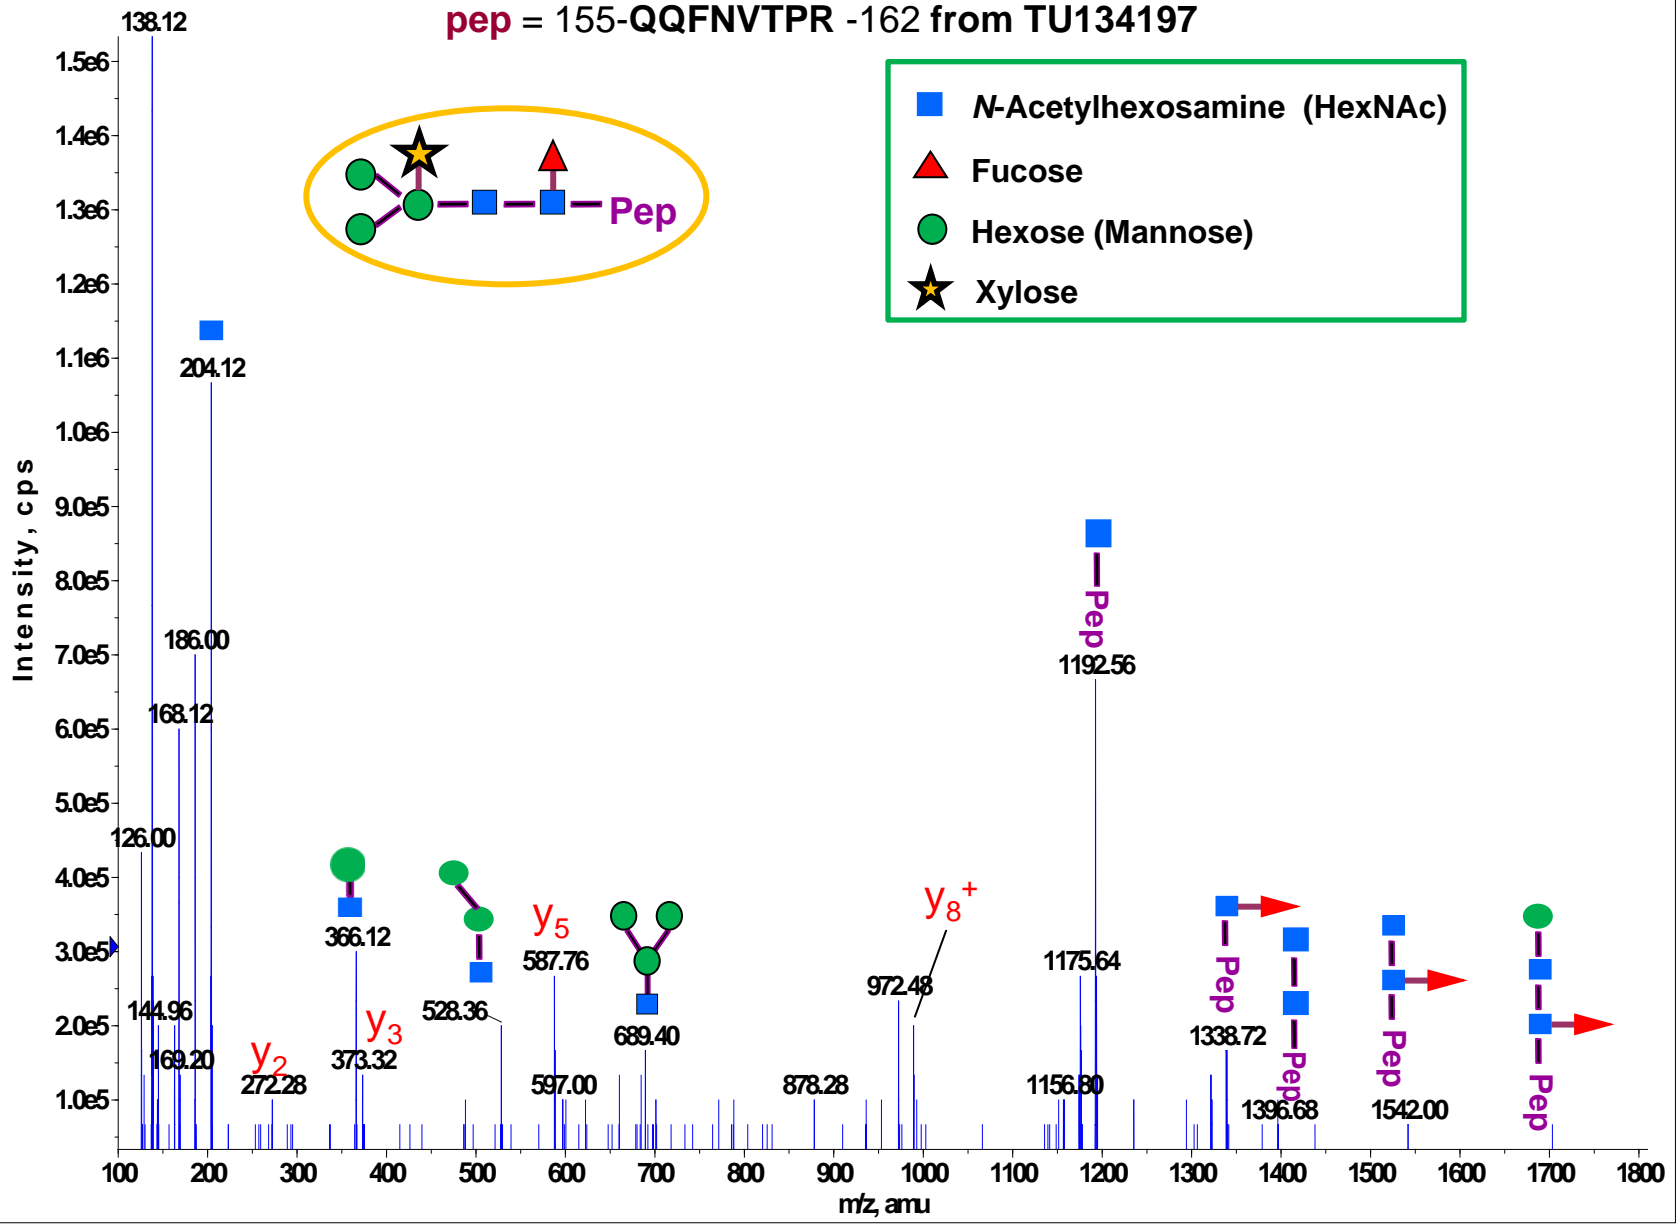

Supplement: supp_M113.028969_mcp.M113.028969-5.pdf [file supp_M113.028969_mcp.M113.028969-5.pdf]
