# Supplementary material
Source: PubMed Central journal article supplement (PMC3916654)
Supplement: supp_M113.028969_mcp.M113.028969-4.pdf [file supp_M113.028969_mcp.M113.028969-4.pdf]

# Supplemental Figure S4

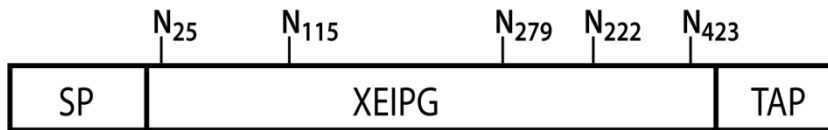

**MASSNCLHAILLCSLLFITSTIAQNQTSFRPKGLIIPVTKDASTLQYLTOIQQRTPLVPISLTLDLGGQF**  
**LWVDCDQGYVSSSYKPARCGSAQCSSLGGASGCGECFSPPRPGCN**NNTCGLLPDNTVTGTATSGELASDVV  
**SVESSNGKNPGRSVSDKNFLFVCGATFLLQGLASGVKGMAGLGRTKISLPSQFSAEFSFPRKFALCLTSS**  
**SNSKGVVLFGDGPYFFLPNRQFSNNDFOYTPLFINPVSTASAFSSGQPSSEYFIGVKS IKINQKVP**INT  
**TLLSIDNQVGGTKISTVNPYTILETSLYNAITNFFVKELAN**VTRVAVVAPFRVCFDSRDIGSTRVGPVAV  
**PSIDLVLQANVWWTIFGANSMVQVSENVLC LGVLDGGVNARTSIVIGGHTIEDNLLQFDHAASRLGFTS**  
**SILFRQTTCANF**NFTSID
