# Supplementary material
Source: PubMed Central journal article supplement (PMC3916654)

Supplemental Data Set 2. MS/MS spectra  
of the *N*-glycans of the recombinant  
xyloglucan-specific fungal endoglucanase  
inhibitor protein (XEIPG)

# ELANVTR

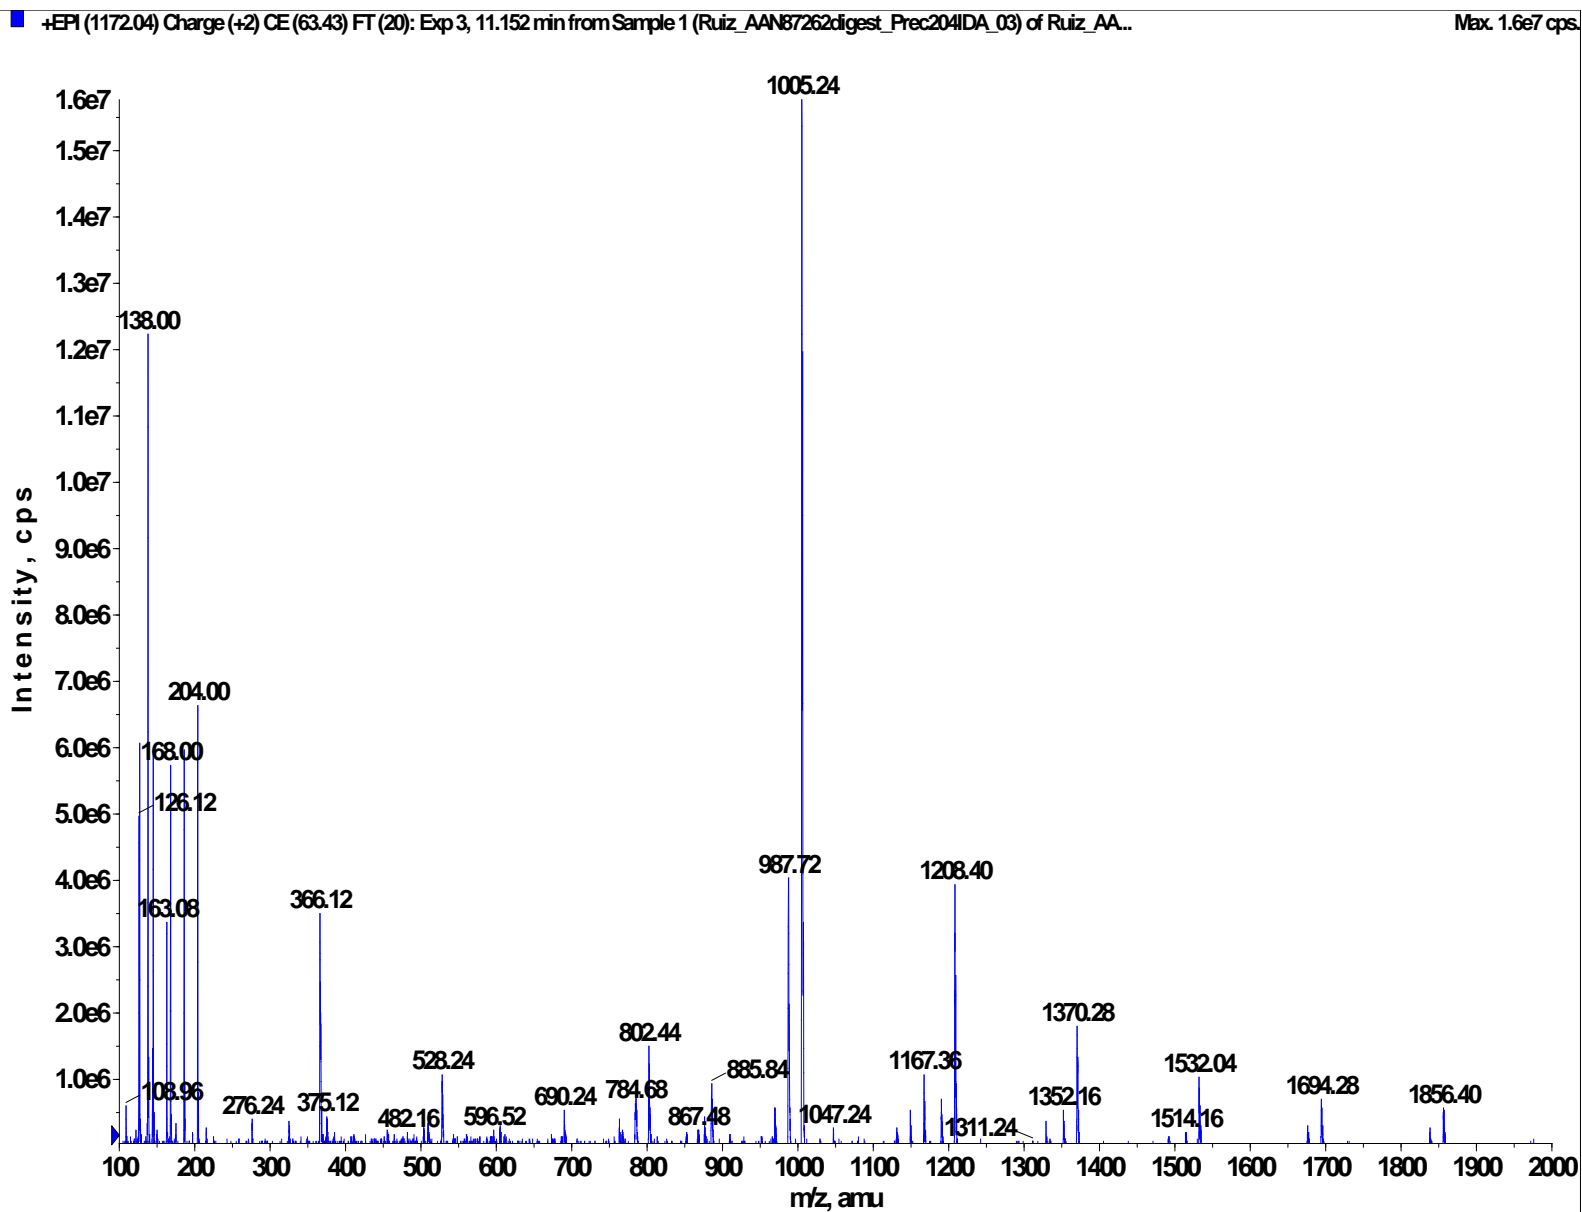

# ELANVTR

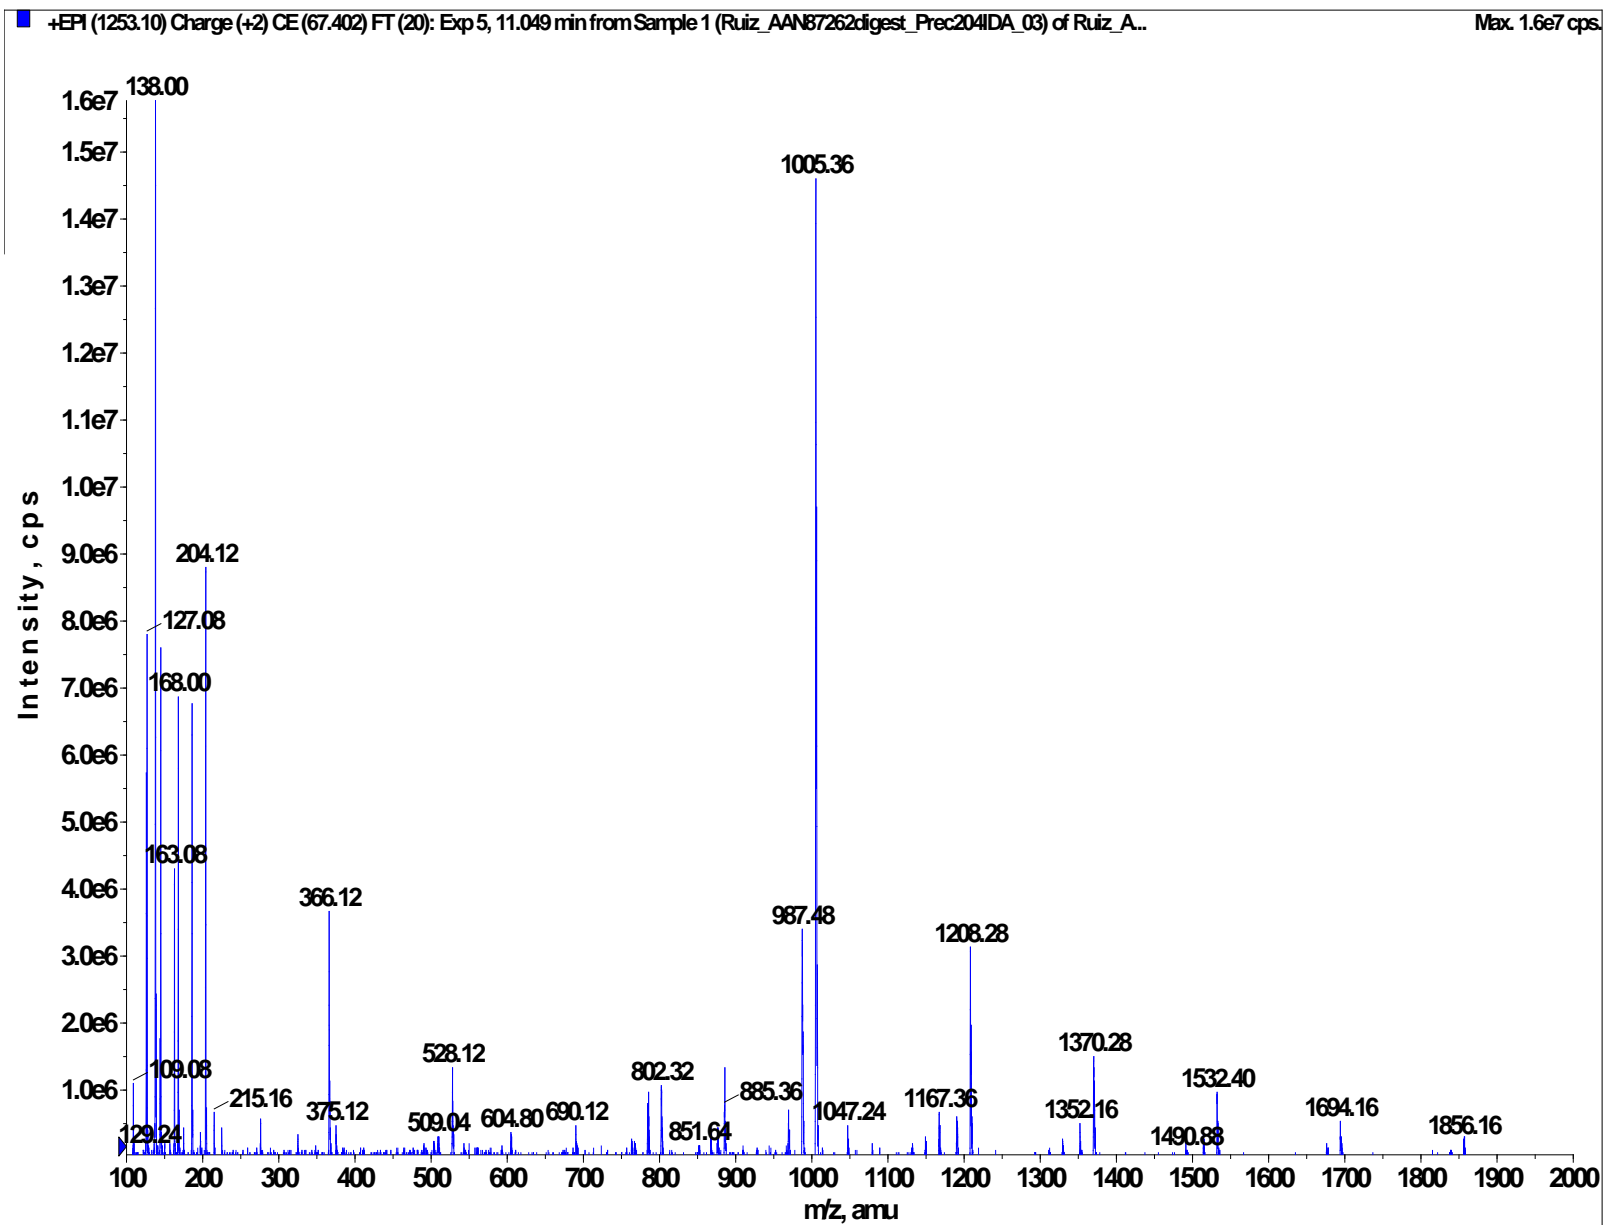

# QNQTSFRPK

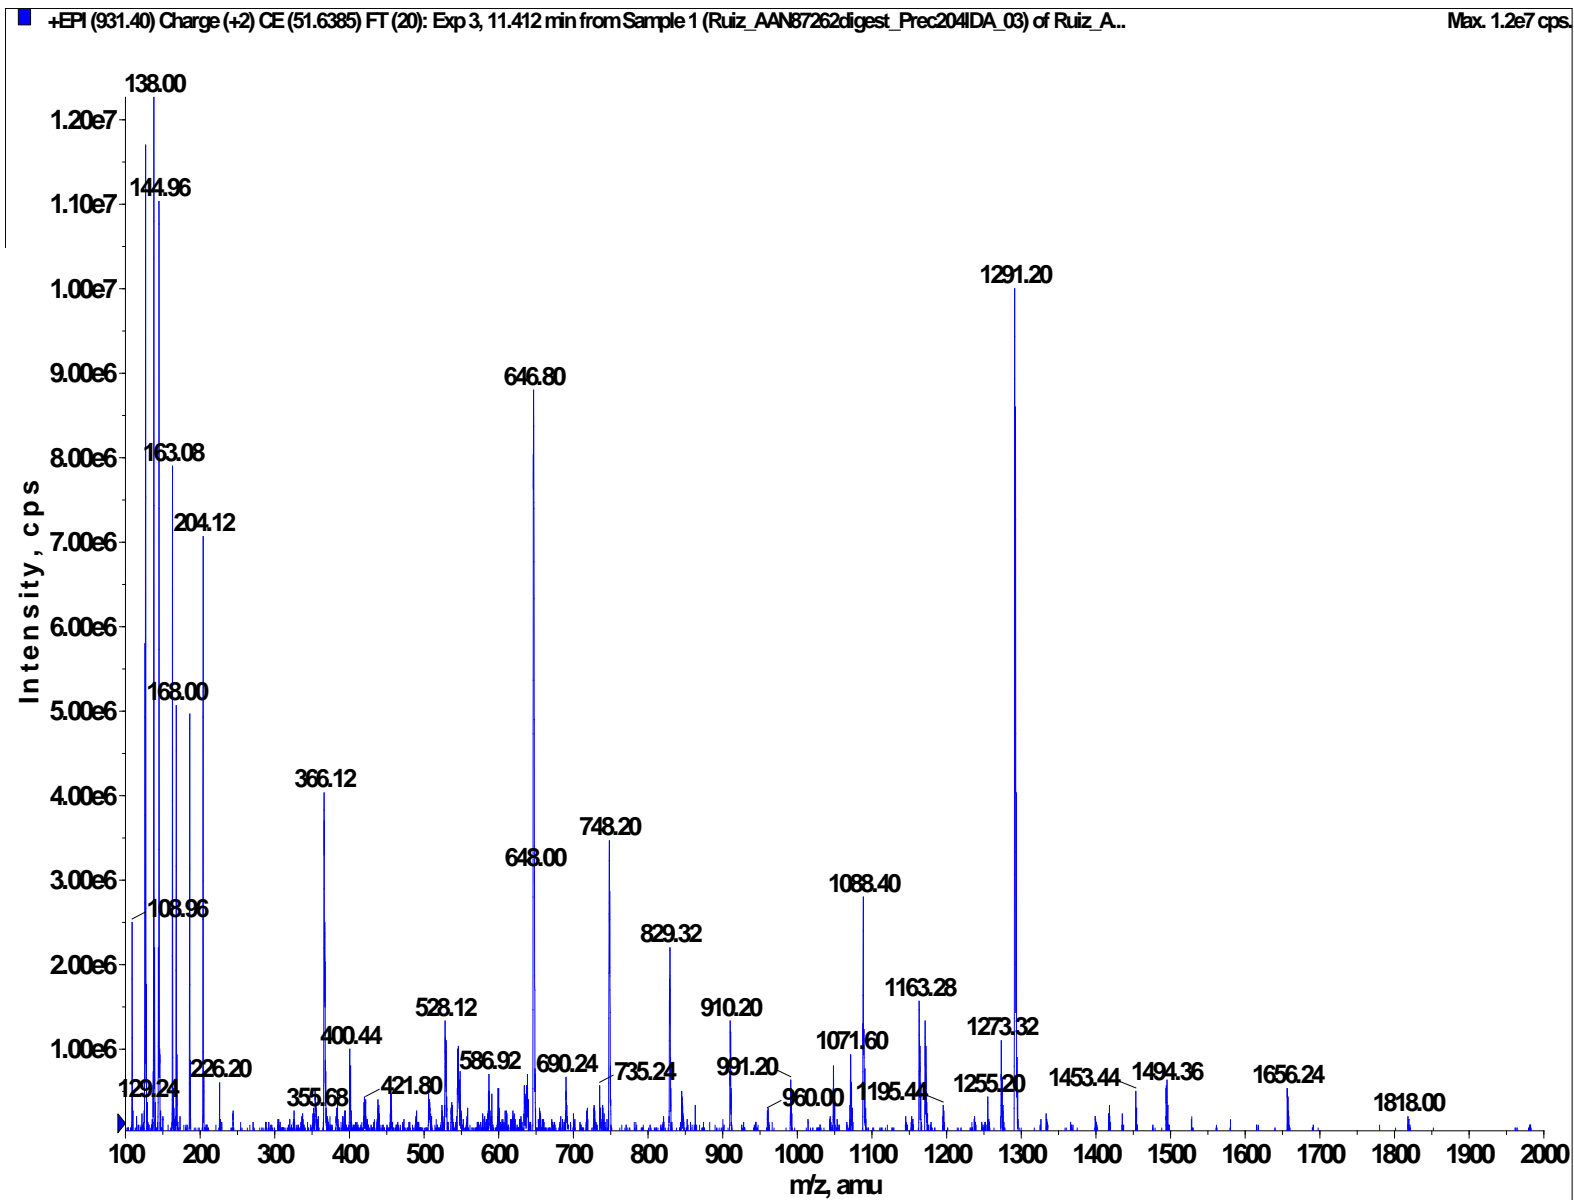

# QNQTSFRPK

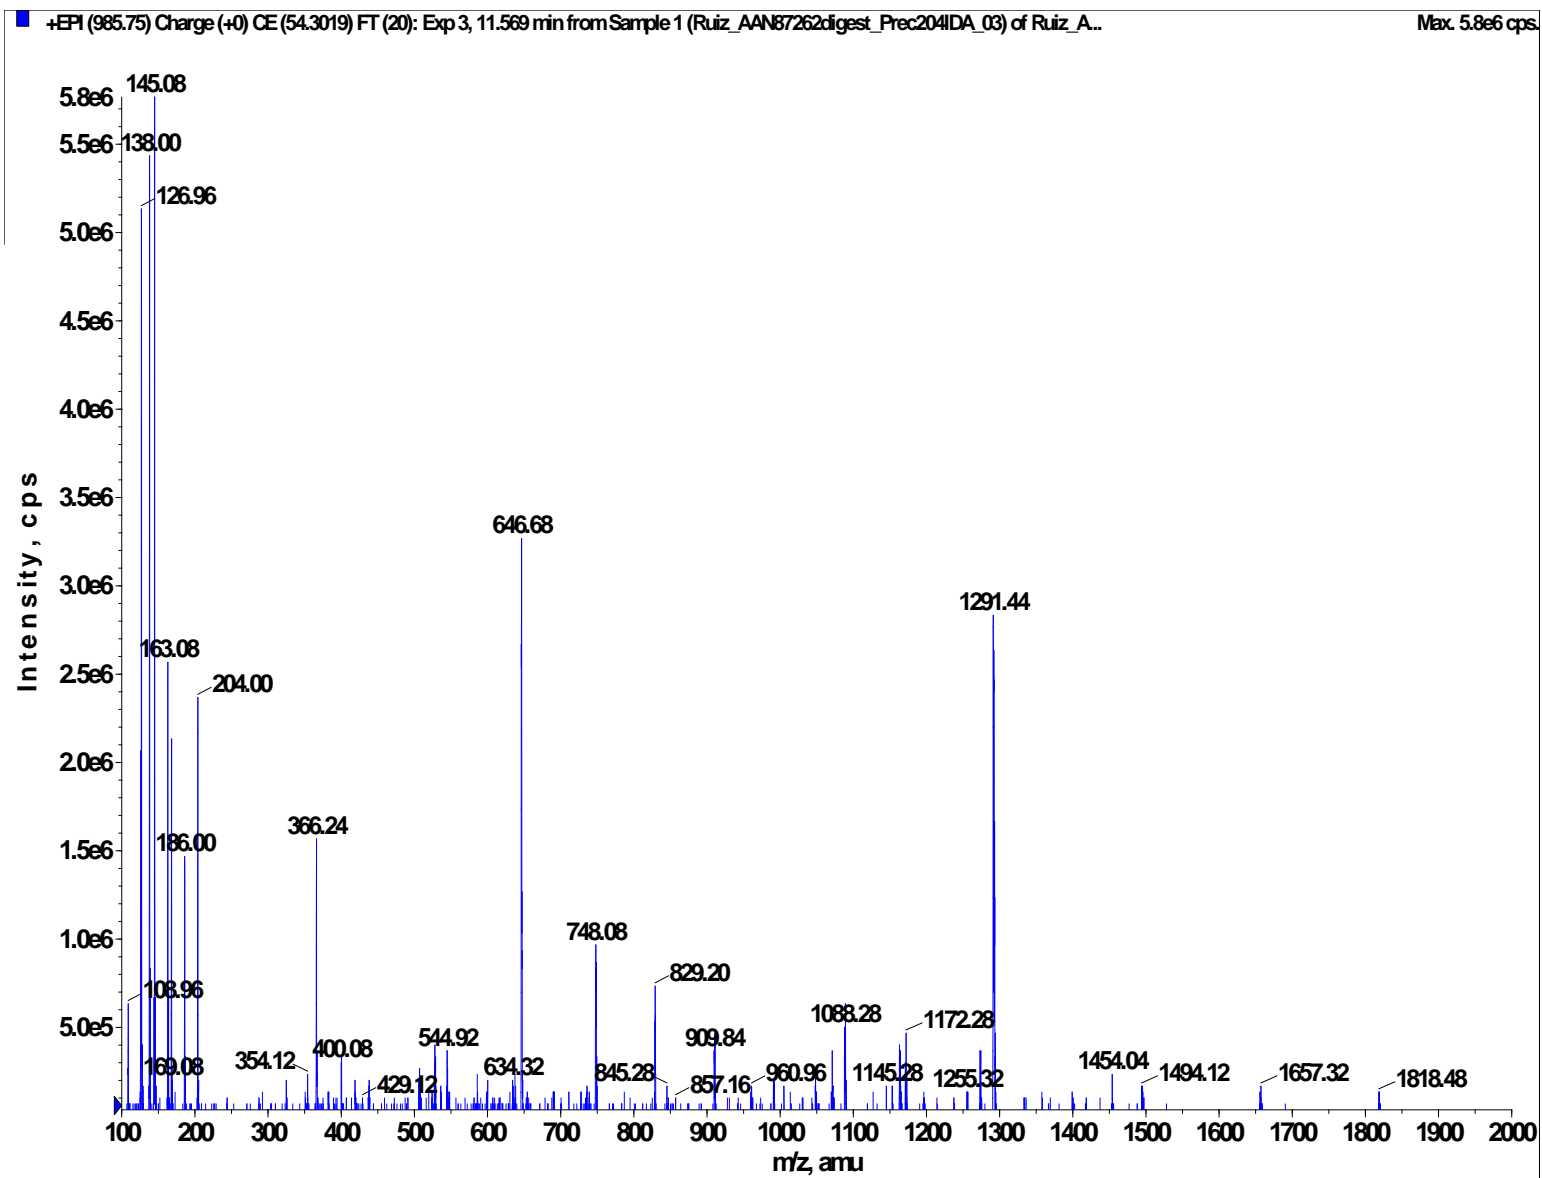

# VVPIN**T**TLLSIDNQGVGGTK

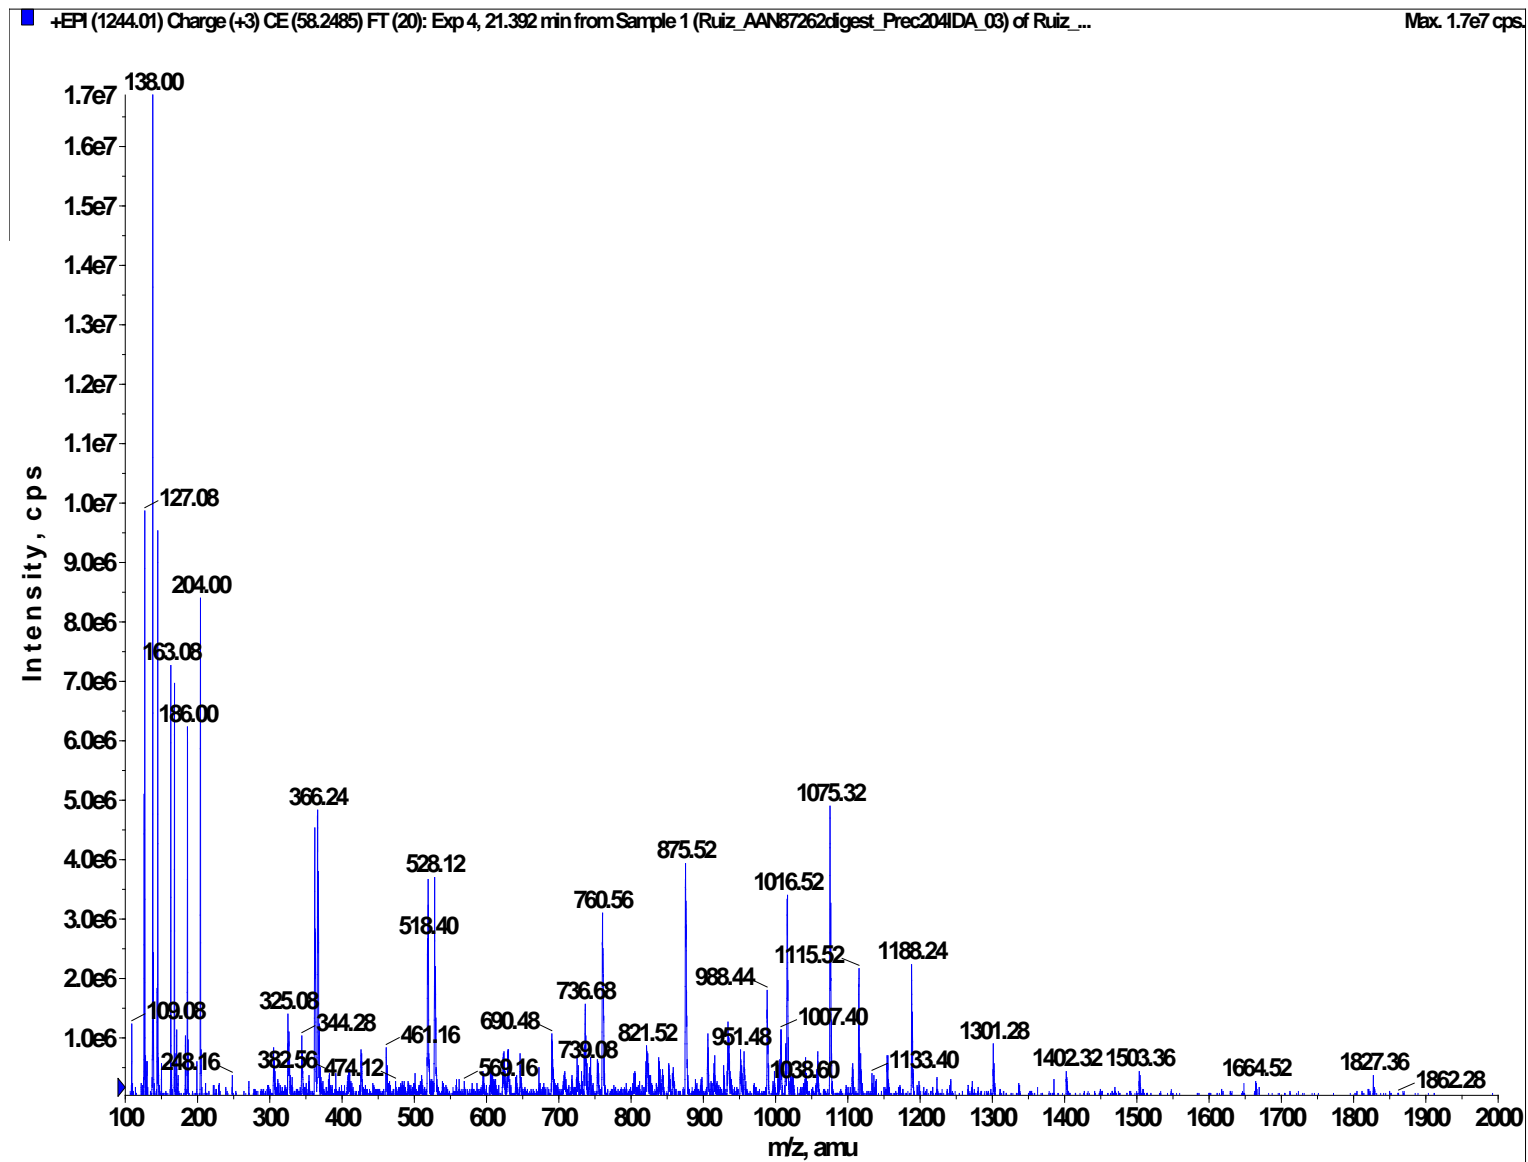

# VVPIN<sup>+</sup>TLLSIDNQGVGGTK

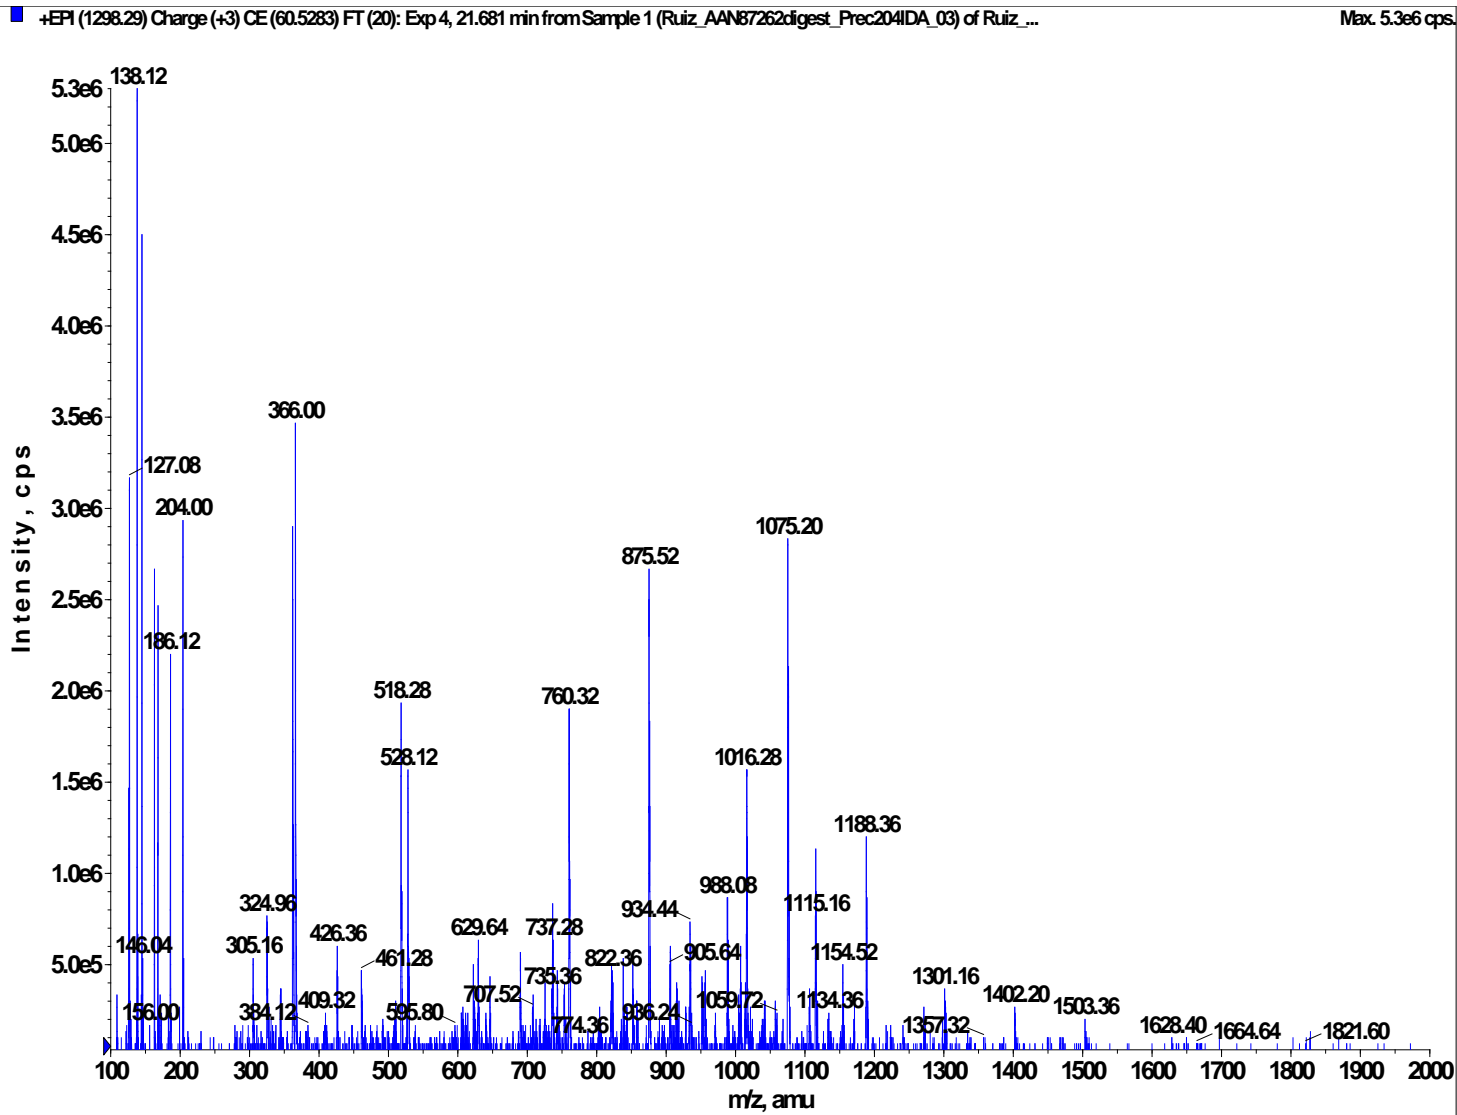

# QTTCANFNFTSIDdpaflyk

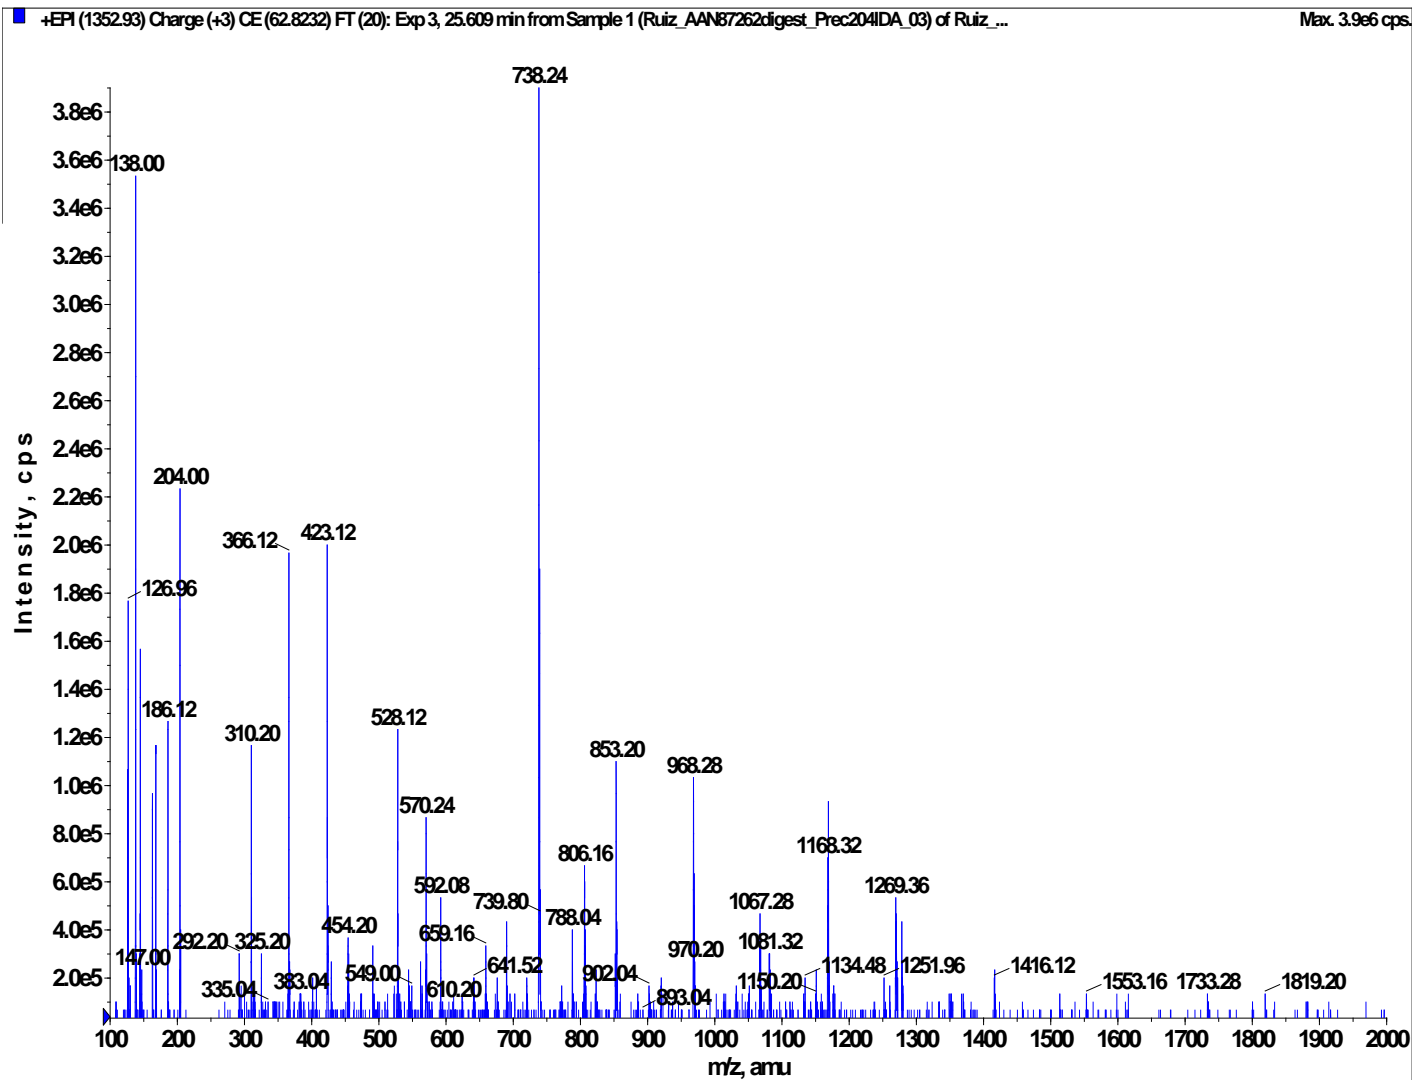



# QTTCANFNFTSIDdpaflyk

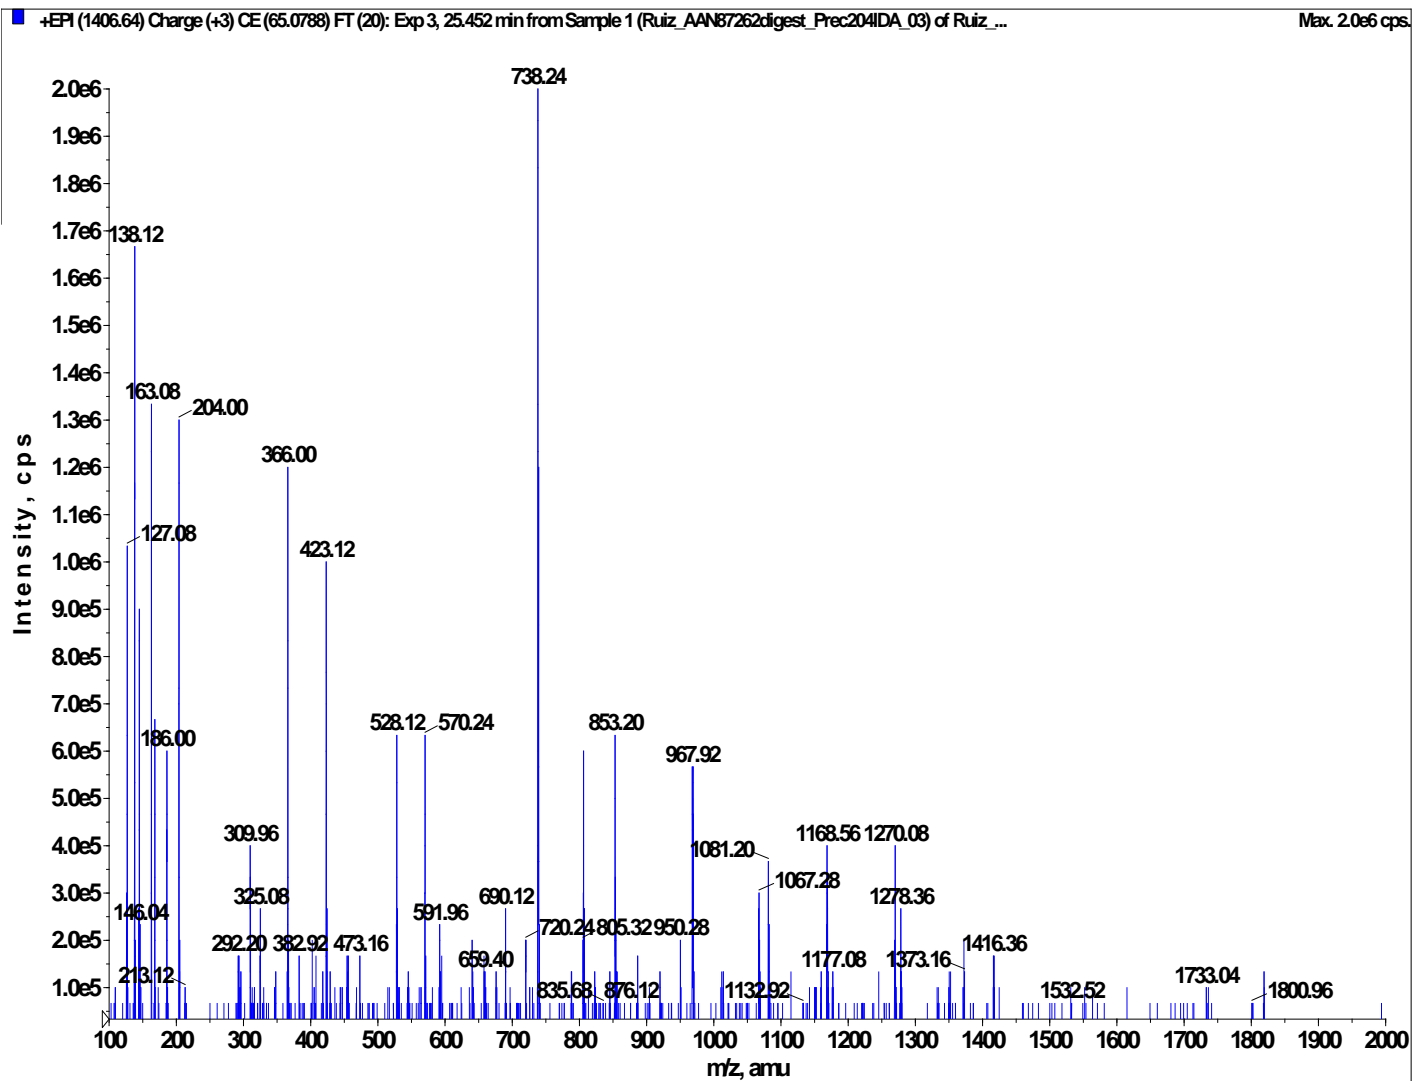

Supplement: supp_M113.028969_mcp.M113.028969-6.pdf [file supp_M113.028969_mcp.M113.028969-6.pdf]
