# Supplementary material
Source: PubMed Central journal article supplement (PMC3916654)
Supplement: supp_M113.028969_mcp.M113.028969-7.pdf [file supp_M113.028969_mcp.M113.028969-7.pdf]

## **Supplemental figure legends**

**Supplemental figure S1.** Peptides attached to the porous graphitic carbon (PGC) column and in the flow through were analyzed. Most of the peptides were observed in the bound fraction.

**Supplemental figure S2.** Venn diagram of the proteins without a signal peptide identified through shotgun sequencing after MLAC.

**Supplemental figure S3.** Comparison between glycoproteins identified in the present study and those from previous studies in plants. Previous studies used Arabidopsis as biological system, so Arabidopsis homologs of tomato glycoproteins were used for the comparison.

**Supplemental figure S4.** Specific location of the *N*-glycosylation sites in the protein sequence of the xyloglucan-specific endoglucanase inhibitor protein (XEGIP).

**Supplemental data S1.** MS/MS spectra of identified *N*-glycopeptides. The symbol nomenclature for glycan representation was followed according to Varki et al. (2009).

**Supplemental data S2.** MS/MS spectra of the *N*-glycans of the recombinant xyloglucan-specific endoglucanase inhibitor protein (XEGIP).

**Supplemental table S1.** *N*-glycoproteins identified in tomato fruit by shotgun proteomics after multi-lectin enrichment. The functional categories are indicated in colors.

**Supplemental table S2.** Glycopeptides identified by deamidation assay using PGNase A. Positive deamidation were considered in glycopeptides with the sequon N- X- S/T and signal peptide.

**Supplemental table S3.** Analysis of the mean grand average of hydropathicity (GRAVY) index score, isoelectric point (pI) and molecular weight (Mw) of the *N*-glycopeptides identified in this study.

**Supplemental table S4.** Total proteins identified by shotgun proteomics and deamidation assay. Arabidopsis homologs of tomato glycoproteins were used to compare the database generated in tomato with previous reports in Arabidopsis.

**Supplemental table S5.** Propose subcellular location of identified glycoproteins base of bioinformatics analysis.

**Supplemental table S6.** Proteins without signal peptide identified through shotgun sequencing after MLAC. These proteins were not *N*-glycosylated and with non-specific binding to each lectin.
