# Supplementary material
Source: PubMed Central journal article supplement (PMC3916654)

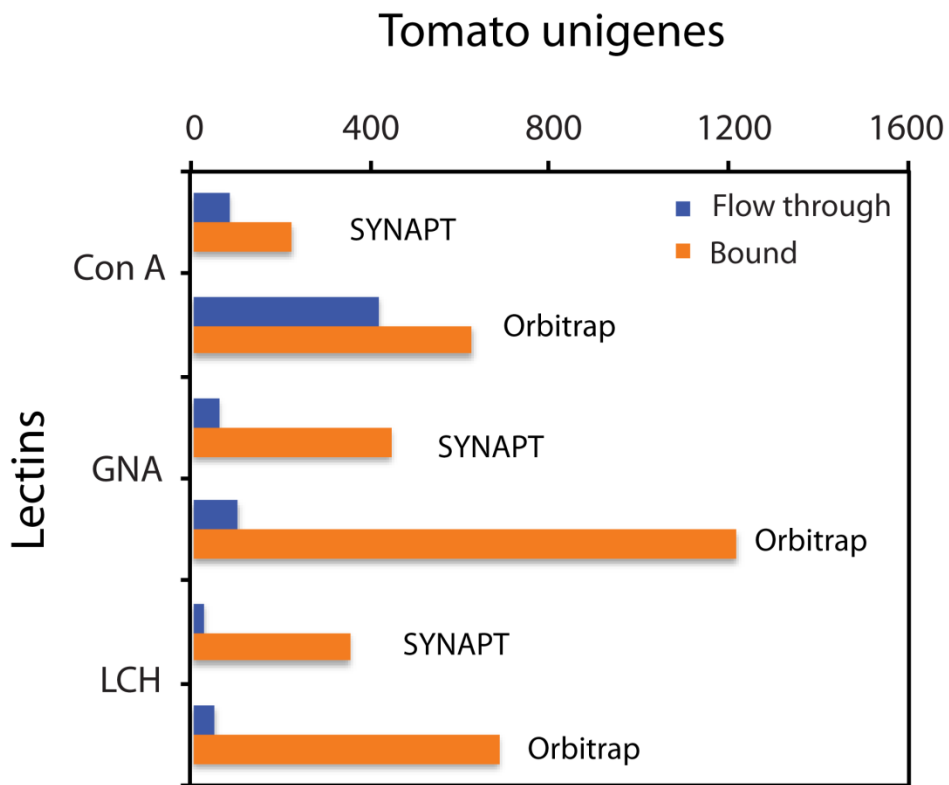

Supplement: supp_M113.028969_mcp.M113.028969-1.pdf [file supp_M113.028969_mcp.M113.028969-1.pdf]

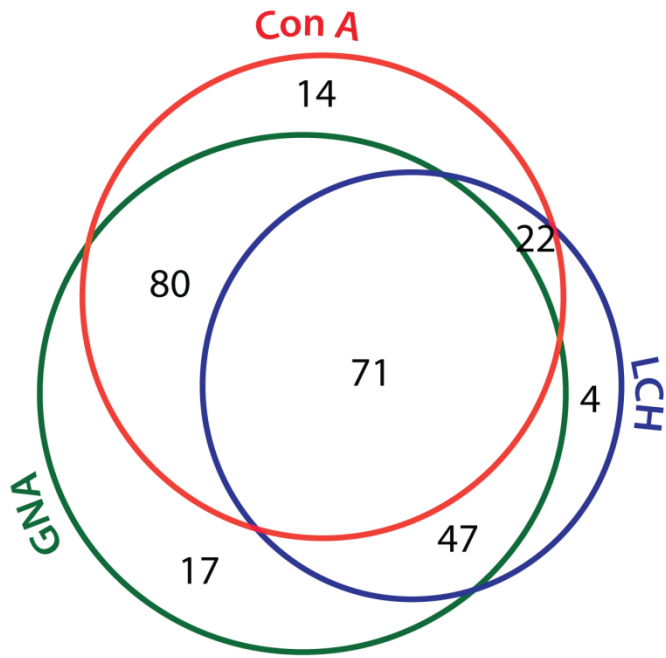

Supplement: supp_M113.028969_mcp.M113.028969-2.pdf [file supp_M113.028969_mcp.M113.028969-2.pdf]

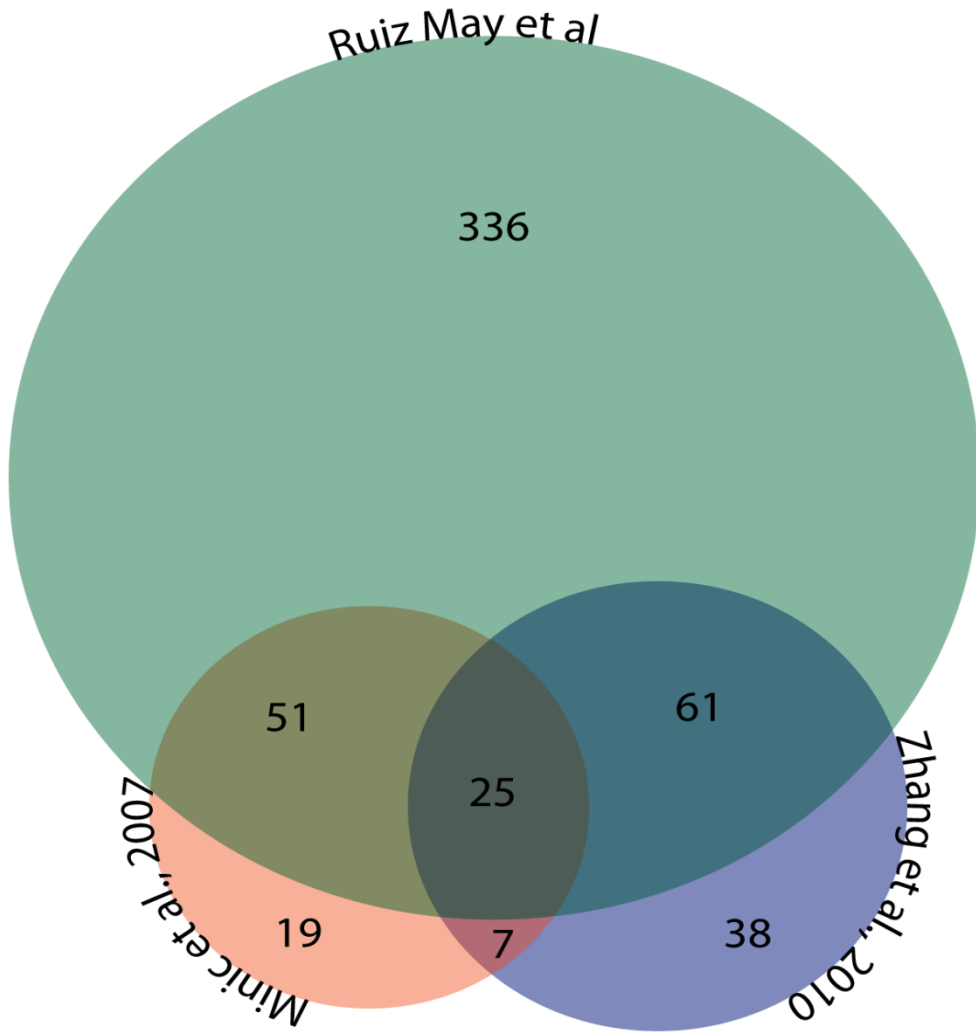

Supplement: supp_M113.028969_mcp.M113.028969-3.pdf [file supp_M113.028969_mcp.M113.028969-3.pdf]
